# Supplementary material for: Recovery of per- and polyfluoroalkyl substances after solvent evaporation
Source: Royal Society of Chemistry journal article supplement (doi:10.1039/d2em00269h), 2022-01-01

## Supporting Information

**Manuscript Title:** Recovery of Per- and Polyfluoroalkyl Substances After Solvent Evaporation

**Authors:**

**Page number:** 20

**Figure number:** 10

**Table number:** 4

## Supplemental Methods

**UPLC-MS analysis-** All samples were run on an Agilent 6495C triple quadrupole mass spectrometer with a 1290 Infinity II liquid chromatograph system. A 100  $\mu$ L aliquot of each sample is injected onto an LC system with 100  $\mu$ L sample loop and separated on a Phenomenex Kinetex F5 analytical column (2.1 x 100 mm, 2.6  $\mu$ m particle size; Phenomenex, Torrance, CA). The aqueous mobile phase (A) is 5% HPLC-grade acetonitrile in water with 0.1% formic acid and the organic mobile phase (B) is 5% water in HPLC-grade acetonitrile with 0.1% formic acid. Gradient: initial 20% B to 99% B at 7 min and held 99% B until 8 min, then to 20% B at 8.01 min and held at 20% B until 10 min for a total analysis time of 10 min. Flow rate was 0.5 mL/min at a column temperature of 45 °C. A 3 second needle wash was included before each injection to eliminate cross contamination. The LC had also been retrofitted with non-Teflon tubing and an InfinityLab Poroshell HPH-C18 delay column (3.0 x 50 mm, 4 $\mu$ m; Agilent, Santa Clara, CA) installed in the solvent path prior to the sample injection to delay any PFAS present in the LC eluent. A dynamic multiple reaction monitoring (DMRM) method was used to measure the quant and qual ions of the analytes (**Table S2**) with instrument parameters as follows: Drying gas temperature: 100°C; Drying gas flow rate: 15 L/min; Sheath gas temperature: 300°C; Sheath gas flow rate: 11 L/min; Nebulizer pressure: 15 psi; Capillary voltage: 2,000 V (-) and 3,000 V (+); Nozzle voltage: 0 V (-) and 1,500 V (+); High Pressure RF: 90 V (-) and 150 V (+); Low Pressure RF: 60 V (-) and 60 V (+); Delta EMV: 200 (-) and 0 (+). For this LC method (solvents and column) previous validation data (Enders et al Rapid Commun Mass Spectrom 2022, 36(11):e9295) showed no carryover up as high as 10,000 ng/L. Samples were run in increasing concentration order to further minimize the potential for carryover. All samples with a high concentration were run with three subsequent solvent blanks.

**Data analysis-** Samples were analyzed using Agilent Quantitative Analysis software version 10.0. Peak areas were exported for the comparison analysis. The comparison was done by averaging the controls responses and then normalizing each treatment replicate to the control to obtain a ratio that can be compared among analytes. Those ratios were then plotted in GraphPad Prism (version 9.3.0) as a bar graph with replicates shown as seen in supplemental **Figures S1-S10**. A non-normalized heat map showing the average normalized ratio for each treatment per compound and concentration was used to show trends across compound class and concentrations, **Figure 3**. For the recovery study, **Figure 1**, the same normalization was performed, and either an unpaired two-tailed student T test or a Welch's T Test were used to determine the significance difference between the reconstitution methods. Welch's T test was employed when p-value for the F-test was significant ( $P < 0.05$ ) which indicated that the variance between the two treatments was not equal and therefore a T test with a correction factor needed to be employed. See supplementary **Table S3** for statistical results of related figures.

**Data Repository-** The raw data can be found in an online repository at panoramaweb.org or by clicking this [link](#). If the link does not work, navigate to <https://panoramaweb.org/> using a web browser of your choice. Then click the Home button in the upper left-hand corner to drop down a list of projects. Scroll down to and click "NCSU- METRIC", click METRIC Public Data, click the folder labeled "RECOVERY OF PER- AND POLYFLUOROALKYL SUBSTANCES AFTER SOLVENT EVAPORATION", and finally click the "Raw Data" button in the upper right hand corner of the page to access the raw files.

**Table S1-** Analyte list with CAS #, full chemical name and vendor source.

| Abbreviation                                   | Analyte                                                                                                    | CAS #       | CCL* | Vendor † |
|------------------------------------------------|------------------------------------------------------------------------------------------------------------|-------------|------|----------|
| <b>Perfluoroalkyl carboxylic acids (PFCA)</b>  |                                                                                                            |             |      |          |
| PFBA                                           | Perfluorobutanoic acid                                                                                     | 375-22-4    | 4    | CIL      |
| PFPeA                                          | Perfluoropentanoic acid                                                                                    | 2706-90-3   | 5    | CIL      |
| PFHxA                                          | Perfluorohexanoic acid                                                                                     | 307-24-4    | 6    | CIL      |
| PFHpA                                          | Perfluoroheptanoic acid                                                                                    | 375-85-9    | 7    | CIL      |
| PFOA                                           | Perfluorooctanoic acid                                                                                     | 335-67-1    | 8    | CIL      |
| PFNA                                           | Perfluorononanoic acid                                                                                     | 375-95-1    | 9    | CIL      |
| PFDA                                           | Perfluorodecanoic acid                                                                                     | 335-76-2    | 10   | CIL      |
| PFUnDA                                         | Perfluoroundecanoic acid                                                                                   | 2058-94-8   | 11   | CIL      |
| PFDODA                                         | Perfluorododecanoic acid                                                                                   | 307-55-1    | 12   | CIL      |
| PFTTrDA                                        | Perfluorotridecanoic acid                                                                                  | 72629-94-8  | 13   | CIL      |
| PFTeDA                                         | Perfluorotetradecanoic acid                                                                                | 376-06-7    | 14   | CIL      |
| PFHxDA                                         | Perfluorohexadecanoic acid                                                                                 | 67905-19-5  | 16   | CIL      |
| PFODA                                          | Perfluorooctadecanoic acid                                                                                 | 16517-11-6  | 18   | CIL      |
| <b>Perfluoroalkyl sulfonic acids (PFSA)</b>    |                                                                                                            |             |      |          |
| PFBS                                           | Perfluorobutanesulfonic acid                                                                               | 375-73-5    | 4    | CIL      |
| PFPeS                                          | Perfluoropentanesulfonic acid                                                                              | 2706-91-4   | 5    | CIL      |
| PFHxS                                          | Perfluorohexanesulfonic acid                                                                               | 355-46-4    | 6    | CIL      |
| PFHpS                                          | Perfluoroheptanesulfonic acid                                                                              | 375-92-8    | 7    | CIL      |
| PFOS                                           | Perfluorooctanesulfonic acid                                                                               | 1763-23-1   | 8    | CIL      |
| PFNS                                           | Perfluorononanesulfonic acid                                                                               | 68259-12-1  | 9    | CIL      |
| PFDS                                           | Perfluorodecanesulfonic acid                                                                               | 2806-15-7   | 10   | CIL      |
| <b>Perfluoroether carboxylic acids (PFECA)</b> |                                                                                                            |             |      |          |
| PFMOAA                                         | Perfluoro-2-methoxyacetic acid                                                                             | 674-13-5    | -    | CIL      |
| PMPA                                           | Perfluoro-2-methoxypropanoic acid                                                                          | 377-73-1    | -    | CH       |
| PEPA                                           | Perfluoro-2-ethoxypropanoic acid                                                                           | 267239-61-2 | -    | FL       |
| PFO2HxA                                        | Perfluoro-3,5-dioxahexanoic acid                                                                           | 39492-88-1  | -    | CH       |
| PFO3OA                                         | Perfluoro-3,5,7-trioxaoctanoic acid                                                                        | 39492-89-2  | -    | FL       |
| Gen-X                                          | Perfluoro-2-propoxypropanoic acid                                                                          | 13252-13-6  | -    | CIL      |
| PFO4DA                                         | Perfluoro-3,5,7,9-butaododecanoic acid                                                                     | 39492-90-5  | -    | FL       |
| PFO5DoDA                                       | Perfluoro-3,5,7,9,11-pentaododecanoic acid                                                                 | 39492-91-6  | -    | FL       |
| Hydro-EVE                                      | 2,2,3,3-Tetrafluoro-3-[[1,1,1,2,3,3-hexafluoro-3-(1,2,2,2-tetrafluoroethoxy)propan-2-yl]oxy}propanoic acid | 773804-62-9 | -    | CH       |
| ADONA                                          | 4,8-Dioxa-3H-perfluorononanoic acid                                                                        | 919005-14-4 | -    | CIL      |

**Perfluoroether sulfonic acids (PFESA)**

|            |                                                                                   |              |   |     |
|------------|-----------------------------------------------------------------------------------|--------------|---|-----|
| NBP 1      | Perfluoro-3,6-dioxa-4-methyl-7-octene-1-sulfonic acid                             | 29311-67-9   | - | CIL |
| NBP 2      | Perfluoro-2-[[perfluoro-3-(perfluoroethoxy)-2-propanyl]oxy]ethanesulfonic acid    | 749836-20-2  | - | CIL |
| NBP 4      | Pentanoic acid, 2,2,3,3,4,5,5,5-octafluoro-4-(1,1,2,2-tetrafluoro-2-sulfoethoxy)- | 2416366-18-0 |   | CH  |
| NVHOS      | 1-(1,1,2,2-tetrafluoro-2-sulfoethoxy)-1,2,2,2-tetrafluoroethane                   | 1132933-86-8 |   | CH  |
| F53B Major | 9-chlorohexadecafluoro-3-oxanonane-1-sulfonate                                    | 73606-19-6   | - | CIL |
| F53B Minor | 11-chloroeicosafluoro-3-oxaundecane-1-sulfonate                                   | 83329-89-9   | - | CIL |

**Perfluoroalkyl sulfonamides (PFSAm)**

|          |                                                |            |   |     |
|----------|------------------------------------------------|------------|---|-----|
| FBSA     | Perfluorobutane sulfonamide                    | 30334-69-1 | 4 | CIL |
| FHxSA    | Perfluorohexane sulfonamide                    | 41997-13-1 | 6 | CIL |
| NMeFOSAA | N-methyl perfluorooctanesulfonamidoacetic acid | 2355-31-9  | 8 | CIL |
| NEtFOSAA | N-ethyl perfluorooctanesulfonamidoacetic acid  | 2991-50-6  | 8 | CIL |
| FOSA     | Perfluorooctane sulfonamide                    | 754-91-6   | 8 | CIL |
| MeFOSA   | N-Methylperfluorooctanesulfonamide             | 31506-32-8 | 8 | CIL |

**Fluorotelomer sulfonic acids (FTS)**

|          |                                  |             |    |     |
|----------|----------------------------------|-------------|----|-----|
| 4:2 FTS  | 4:2 Fluorotelomer sulfonic acid  | 757124-72-4 | 6  | CIL |
| 6:2 FTS  | 6:2 Fluorotelomer sulfonic acid  | 27619-97-2  | 8  | CIL |
| 8:2 FTS  | 8:2 Fluorotelomer sulfonic acid  | 39108-34-4  | 10 | CIL |
| 10:2 FTS | 10:2 Fluorotelomer sulfonic acid | 120226-60-0 | 12 | CIL |

**Zwitterions**

|                          |                                                                          |            |   |     |
|--------------------------|--------------------------------------------------------------------------|------------|---|-----|
| N-AP-FHxSA               | N-(3-dimethylaminopropan-1-yl)perfluoro-1-hexane-sulfonamide             | 50598-28-2 | 6 | CIL |
| N-TAmP-FHxSA             | N-[3-(perfluoro-1-hexanesulfonamido)propan-1-yl]-N,N,N-trimethylammonium | 38850-51-0 | 6 | CIL |
| N-CMAmP-62FOSA (62 FTAB) | 6:2 Fluorotelomer sulfonamide betaine                                    | 34455-29-3 | 8 | CIL |

\***Abbreviations:** Carbon Chain Length (CCL)

†**Source:** CIL- Cambridge Isotope Laboratories, CH- Chemours, FL- Fluorox

**Table S2-** DMRM transition list. Quant ions are listed first and bolded.

| Compound Name                                 | Precursor Ion | MS1 Resolution | Product Ion   | MS2 Resolution | Fragment (V) | Collision Energy (V) | Cell Accelerator (V) | Retention Time (min) | Retention Window | Polarity |
|-----------------------------------------------|---------------|----------------|---------------|----------------|--------------|----------------------|----------------------|----------------------|------------------|----------|
| <b>Perfluoroalkyl carboxylic acids (PFCA)</b> |               |                |               |                |              |                      |                      |                      |                  |          |
| PFBA                                          | 212.98        | Wide           | <b>168.90</b> | Widest         | 166          | 10                   | 4                    | 3.3                  | 6                | Negative |
| PFBA                                          | 212.98        | Wide           | 212.98        | Widest         | 166          | 0                    | 4                    | 3.3                  | 6                | Negative |
| PFPeA                                         | 262.97        | Wide           | <b>219.04</b> | Widest         | 166          | 9                    | 4                    | 6.9                  | 1.5              | Negative |
| PFPeA                                         | 262.97        | Wide           | 262.97        | Widest         | 166          | 0                    | 4                    | 6.9                  | 1.5              | Negative |
| PFHxA                                         | 312.97        | Wide           | <b>118.90</b> | Widest         | 166          | 22                   | 4                    | 8.44                 | 1.5              | Negative |
| PFHxA                                         | 312.97        | Wide           | 268.90        | Widest         | 166          | 10                   | 4                    | 8.44                 | 1.5              | Negative |
| PFHpA                                         | 362.97        | Wide           | <b>318.80</b> | Widest         | 166          | 10                   | 4                    | 9.5                  | 1.5              | Negative |
| PFHpA                                         | 362.97        | Wide           | 168.90        | Widest         | 166          | 18                   | 4                    | 9.5                  | 1.5              | Negative |
| PFOA                                          | 412.96        | Wide           | <b>368.80</b> | Widest         | 166          | 10                   | 4                    | 10.39                | 1.5              | Negative |
| PFOA                                          | 412.96        | Wide           | 168.90        | Widest         | 166          | 18                   | 4                    | 10.39                | 1.5              | Negative |
| PFNA                                          | 462.96        | Wide           | <b>419.00</b> | Widest         | 166          | 10                   | 4                    | 11.18                | 1.5              | Negative |
| PFNA                                          | 462.96        | Wide           | 218.90        | Widest         | 166          | 14                   | 4                    | 11.18                | 1.5              | Negative |
| PFDA                                          | 512.96        | Wide           | <b>469.00</b> | Widest         | 166          | 10                   | 4                    | 11.9                 | 1.5              | Negative |
| PFDA                                          | 512.96        | Wide           | 268.80        | Widest         | 166          | 18                   | 4                    | 11.9                 | 1.5              | Negative |
| PFUnDA                                        | 562.95        | Wide           | <b>518.90</b> | Widest         | 166          | 10                   | 4                    | 12.61                | 1.5              | Negative |
| PFUnDA                                        | 562.95        | Wide           | 268.80        | Widest         | 166          | 18                   | 4                    | 12.61                | 1.5              | Negative |
| PFDoDA                                        | 612.95        | Wide           | <b>568.80</b> | Widest         | 166          | 10                   | 4                    | 13.3                 | 1.5              | Negative |
| PFDoDA                                        | 612.95        | Wide           | 318.80        | Widest         | 166          | 22                   | 4                    | 13.3                 | 1.5              | Negative |
| PFTTrDA                                       | 662.95        | Wide           | <b>618.90</b> | Widest         | 166          | 10                   | 4                    | 13.96                | 1.5              | Negative |
| PFTTrDA                                       | 662.95        | Wide           | 168.90        | Widest         | 166          | 30                   | 4                    | 13.96                | 1.5              | Negative |
| PFTeDA                                        | 712.94        | Wide           | <b>668.80</b> | Widest         | 166          | 10                   | 4                    | 14.49                | 1.5              | Negative |
| PFTeDA                                        | 712.94        | Wide           | 168.80        | Widest         | 166          | 30                   | 4                    | 14.49                | 1.5              | Negative |
| PFHxDA                                        | 812.94        | Wide           | <b>768.90</b> | Widest         | 166          | 14                   | 4                    | 14.75                | 1.5              | Negative |
| PFHxDA                                        | 812.94        | Wide           | 218.90        | Widest         | 166          | 30                   | 4                    | 14.75                | 1.5              | Negative |
| PFODA                                         | 912.93        | Wide           | <b>868.90</b> | Widest         | 166          | 14                   | 4                    | 15.03                | 1.5              | Negative |
| PFODA                                         | 912.93        | Wide           | 218.90        | Widest         | 166          | 34                   | 4                    | 15.03                | 1.5              | Negative |
| <b>Perfluoroalkyl sulfonic acids (PFSA)</b>   |               |                |               |                |              |                      |                      |                      |                  |          |

|                                                |        |      |               |        |     |    |   |       |     |          |
|------------------------------------------------|--------|------|---------------|--------|-----|----|---|-------|-----|----------|
| PFBS                                           | 298.94 | Wide | <b>80.00</b>  | Widest | 166 | 38 | 4 | 8.29  | 1.5 | Negative |
| PFBS                                           | 298.94 | Wide | 99.00         | Widest | 166 | 30 | 4 | 8.29  | 1.5 | Negative |
| PFPeS                                          | 348.94 | Wide | <b>80.00</b>  | Widest | 166 | 46 | 4 | 9.45  | 1.5 | Negative |
| PFPeS                                          | 348.94 | Wide | 99.00         | Widest | 166 | 42 | 4 | 9.45  | 1.5 | Negative |
| PFHxS                                          | 398.93 | Wide | <b>79.90</b>  | Widest | 166 | 40 | 4 | 10.18 | 1.5 | Negative |
| PFHxS                                          | 398.93 | Wide | 98.80         | Widest | 166 | 38 | 4 | 10.18 | 1.5 | Negative |
| PFHpS                                          | 448.93 | Wide | <b>79.90</b>  | Widest | 166 | 46 | 4 | 11.12 | 1.5 | Negative |
| PFHpS                                          | 448.93 | Wide | 98.80         | Widest | 166 | 46 | 4 | 11.12 | 1.5 | Negative |
| PFOS                                           | 498.93 | Wide | <b>80.00</b>  | Widest | 166 | 58 | 4 | 11.59 | 1.5 | Negative |
| PFOS                                           | 498.93 | Wide | 99.00         | Widest | 166 | 42 | 4 | 11.59 | 1.5 | Negative |
| PFNS                                           | 548.92 | Wide | <b>80.00</b>  | Widest | 166 | 50 | 4 | 12.45 | 1.5 | Negative |
| PFNS                                           | 548.92 | Wide | 99.00         | Widest | 166 | 54 | 4 | 12.45 | 1.5 | Negative |
| PFDS                                           | 598.92 | Wide | <b>80.00</b>  | Widest | 166 | 58 | 4 | 13.05 | 1.5 | Negative |
| PFDS                                           | 598.92 | Wide | 99.00         | Widest | 166 | 54 | 4 | 13.05 | 1.5 | Negative |
| <b>Perfluoroether carboxylic acids (PFCEA)</b> |        |      |               |        |     |    |   |       |     |          |
| PFMOAA                                         | 178.97 | Wide | <b>84.90</b>  | Widest | 166 | 0  | 4 | 1.94  | 3   | Negative |
| PMPA                                           | 228.97 | Wide | <b>184.90</b> | Widest | 166 | 10 | 4 | 4.8   | 4   | Negative |
| PMPA                                           | 228.97 | Wide | 84.90         | Widest | 166 | 26 | 4 | 4.8   | 4   | Negative |
| PEPA                                           | 234.98 | Wide | <b>135.00</b> | Widest | 166 | 18 | 4 | 7.2   | 4   | Negative |
| PEPA                                           | 234.98 | Wide | 119.00        | Widest | 166 | 10 | 4 | 7.2   | 4   | Negative |
| PFO2HxA                                        | 244.97 | Wide | <b>85.10</b>  | Widest | 166 | 10 | 4 | 6.3   | 3   | Negative |
| PFO2HxA                                        | 244.97 | Wide | 151.00        | Widest | 166 | 5  | 4 | 6.3   | 3   | Negative |
| Gen-X                                          | 284.59 | Wide | <b>168.90</b> | Widest | 166 | 10 | 4 | 8.76  | 1.5 | Negative |
| Gen-X                                          | 284.59 | Wide | 184.80        | Widest | 166 | 14 | 4 | 8.76  | 1.5 | Negative |
| PFO3OA                                         | 310.96 | Wide | <b>85.00</b>  | Widest | 166 | 10 | 4 | 8.6   | 1.5 | Negative |
| PFO3OA                                         | 310.96 | Wide | 310.96        | Widest | 166 | 0  | 4 | 8.6   | 1.5 | Negative |
| ADONA                                          | 376.96 | Wide | <b>250.90</b> | Widest | 166 | 10 | 4 | 9.86  | 1.5 | Negative |
| ADONA                                          | 376.96 | Wide | 85.00         | Widest | 166 | 30 | 4 | 9.86  | 1.5 | Negative |
| PFO4DA                                         | 376.95 | Wide | <b>85.00</b>  | Widest | 166 | 10 | 4 | 10    | 1.5 | Negative |
| PFO4DA                                         | 376.95 | Wide | 376.95        | Widest | 166 | 0  | 4 | 10    | 1.5 | Negative |
| PFO5DoDA                                       | 442.94 | Unit | <b>85.00</b>  | Widest | 166 | 18 | 4 | 10.9  | 2   | Negative |
| PFO5DoDA                                       | 442.94 | Unit | 442.94        | Widest | 166 | 0  | 4 | 10.9  | 2   | Negative |
| Hydro-EVE                                      | 426.96 | Wide | <b>283.00</b> | Widest | 166 | 10 | 4 | 10.12 | 1.5 | Negative |

|                                                       |        |      |               |        |     |    |   |       |     |          |
|-------------------------------------------------------|--------|------|---------------|--------|-----|----|---|-------|-----|----------|
| Hydro-EVE                                             | 426.96 | Wide | 213.00        | Widest | 166 | 30 | 4 | 10.12 | 1.5 | Negative |
| <b>Perfluoroether sulfonic acids (PFESA)</b>          |        |      |               |        |     |    |   |       |     |          |
| NBP 1                                                 | 442.92 | Wide | <b>262.90</b> | Widest | 166 | 18 | 4 | 10.87 | 1.5 | Negative |
| NBP 1                                                 | 442.92 | Wide | 147.00        | Widest | 166 | 30 | 4 | 10.87 | 1.5 | Negative |
| NBP 2                                                 | 462.93 | Wide | <b>263.00</b> | Widest | 166 | 26 | 4 | 10.82 | 1.5 | Negative |
| NBP 2                                                 | 462.93 | Wide | 213.00        | Widest | 166 | 38 | 4 | 10.82 | 1.5 | Negative |
| NBP 4                                                 | 440.93 | Wide | <b>240.80</b> | Widest | 166 | 26 | 4 | 7.4   | 1.5 | Negative |
| NBP 4                                                 | 440.93 | Wide | 196.90        | Widest | 166 | 34 | 4 | 7.4   | 1.5 | Negative |
| NVHOS                                                 | 296.94 | Wide | <b>116.90</b> | Widest | 166 | 30 | 4 | 7.4   | 1.5 | Negative |
| NVHOS                                                 | 196.94 | Wide | 80.00         | Widest | 166 | 42 | 4 | 7.4   | 1.5 | Negative |
| F53 Major                                             | 530.89 | Wide | <b>350.90</b> | Widest | 166 | 30 | 4 | 12.2  | 1.5 | Negative |
| F53 Major                                             | 530.89 | Wide | 83.10         | Widest | 166 | 30 | 4 | 12.2  | 1.5 | Negative |
| F53 Minor                                             | 630.89 | Wide | <b>450.90</b> | Widest | 166 | 30 | 4 | 13.39 | 1.5 | Negative |
| F53 Minor                                             | 630.89 | Wide | 98.80         | Widest | 166 | 34 | 4 | 13.39 | 1.5 | Negative |
| <b>Perfluoroalkyl sulfonamides (PFSA<sub>m</sub>)</b> |        |      |               |        |     |    |   |       |     |          |
| FBSA                                                  | 297.96 | Wide | <b>77.90</b>  | Widest | 166 | 26 | 4 | 10.13 | 1.5 | Negative |
| FBSA                                                  | 297.96 | Wide | 63.90         | Widest | 166 | 60 | 4 | 10.13 | 1.5 | Negative |
| FHxSA                                                 | 397.95 | Wide | <b>77.90</b>  | Widest | 166 | 30 | 4 | 12.09 | 1.5 | Negative |
| FHxSA                                                 | 397.95 | Wide | 168.80        | Widest | 166 | 30 | 4 | 12.09 | 1.5 | Negative |
| FOSA                                                  | 497.94 | Wide | <b>78.10</b>  | Widest | 166 | 38 | 4 | 13.57 | 1.5 | Negative |
| FOSA                                                  | 497.94 | Wide | 48.10         | Widest | 166 | 60 | 4 | 13.57 | 1.5 | Negative |
| MeFOSA                                                | 511.96 | Wide | <b>169.00</b> | Widest | 166 | 30 | 4 | 14.4  | 1.5 | Negative |
| MeFOSA                                                | 511.96 | Wide | 218.90        | Widest | 166 | 26 | 4 | 14.4  | 1.5 | Negative |
| NMeFOSAA                                              | 569.96 | Wide | <b>418.80</b> | Widest | 166 | 22 | 4 | 14.1  | 1.5 | Negative |
| NMeFOSAA                                              | 569.96 | Wide | 511.80        | Widest | 166 | 22 | 4 | 14.1  | 1.5 | Negative |
| NEtFOSAA                                              | 583.98 | Wide | <b>419.00</b> | Widest | 166 | 18 | 4 | 14.4  | 1.5 | Negative |
| NEtFOSAA                                              | 583.98 | Wide | 526.00        | Widest | 166 | 18 | 4 | 14.4  | 1.5 | Negative |
| <b>Fluorotelomer sulfonic acids (FTS)</b>             |        |      |               |        |     |    |   |       |     |          |
| 4:2 FTS                                               | 326.97 | Wide | <b>307.00</b> | Widest | 166 | 18 | 4 | 7.95  | 1.5 | Negative |
| 4:2 FTS                                               | 326.97 | Wide | 81.00         | Widest | 166 | 30 | 4 | 7.95  | 1.5 | Negative |
| 6:2 FTS                                               | 426.97 | Wide | <b>407.00</b> | Widest | 166 | 26 | 4 | 9.86  | 1.5 | Negative |
| 6:2 FTS                                               | 426.97 | Wide | 81.00         | Widest | 166 | 38 | 4 | 9.86  | 1.5 | Negative |

|                    |        |      |               |        |     |    |   |       |     |          |
|--------------------|--------|------|---------------|--------|-----|----|---|-------|-----|----------|
| 8:2 FTS            | 526.96 | Wide | <b>506.90</b> | Widest | 166 | 30 | 4 | 11.35 | 1.5 | Negative |
| 8:2 FTS            | 526.96 | Wide | 81.10         | Widest | 166 | 34 | 4 | 11.35 | 1.5 | Negative |
| 10:2 FTS           | 626.95 | Wide | <b>606.90</b> | Widest | 166 | 34 | 4 | 12.71 | 1.5 | Negative |
| 10:2 FTS           | 626.95 | Wide | 81.10         | Widest | 166 | 46 | 4 | 12.71 | 1.5 | Negative |
| <b>Zwitterions</b> |        |      |               |        |     |    |   |       |     |          |
| N-AP-FHxSA         | 485.06 | Wide | <b>85.10</b>  | Widest | 166 | 38 | 4 | 11.4  | 1.5 | Positive |
| N-AP-FHxSA         | 485.06 | Wide | 58.10         | Widest | 166 | 60 | 4 | 11.4  | 1.5 | Positive |
| N-TAmP-FHxSA       | 499.07 | Wide | <b>59.10</b>  | Widest | 166 | 60 | 4 | 10.2  | 1.5 | Positive |
| N-TAmP-FHxSA       | 499.07 | Wide | 60.10         | Widest | 166 | 38 | 4 | 10.2  | 1.5 | Positive |
| N-CHAmP-6:2FOSA    | 571.10 | Wide | <b>58.10</b>  | Widest | 166 | 54 | 4 | 10.34 | 1.5 | Positive |
| N-CHAmP-6:2FOSA    | 571.10 | Wide | 104.00        | Widest | 166 | 34 | 4 | 10.34 | 1.5 | Positive |



**Table S3.** One-way ANOVA data for associated figures

| One-Way ANOVA |              |                                             |            |                     |                  |         |                  |
|---------------|--------------|---------------------------------------------|------------|---------------------|------------------|---------|------------------|
| Compound      | Figure       | Comparison                                  | Mean Diff. | 95.00% CI of diff.  | Below threshold? | Summary | Adjusted P Value |
| PFBA          | Fig. 1 & S1A | MeOH No Heat vs. NH <sub>4</sub> OH No Heat | -0.4237    | -0.7731 to -0.07435 | Yes              | *       | 0.015            |
| PFPeA         | Fig. 1 & S1A | MeOH No Heat vs. NH <sub>4</sub> OH No Heat | -0.3255    | -0.5046 to -0.1463  | Yes              | ***     | 0.0005           |
| PFHxA         | Fig. 1 & S1A | MeOH No Heat vs. NH <sub>4</sub> OH No Heat | -0.2818    | -0.4255 to -0.1380  | Yes              | ***     | 0.0002           |
| PFHpA         | Fig. 1 & S1A | MeOH No Heat vs. NH <sub>4</sub> OH No Heat | -0.2843    | -0.4348 to -0.1338  | Yes              | ***     | 0.0003           |
| PFOA          | Fig. 1 & S1A | MeOH No Heat vs. NH <sub>4</sub> OH No Heat | -0.3056    | -0.4450 to -0.1663  | Yes              | ****    | <0.0001          |
| PFNA          | Fig. 1 & S1A | MeOH No Heat vs. NH <sub>4</sub> OH No Heat | -0.2627    | -0.4067 to -0.1186  | Yes              | ***     | 0.0004           |
| N-AP (100)    | Fig. 1 & S7A | MeOH Heat vs. MeOH No Heat                  | -0.151     | -0.5063 to 0.2043   | No               | ns      | 0.626            |
| N-AP (1k)     | Fig. 1 & S7B | MeOH Heat vs. MeOH No Heat                  | -0.328     | -0.4175 to -0.2384  | Yes              | ***     | <.001            |
| N-AP (10k)    | Fig. 1 & S7C | MeOH Heat vs. MeOH No Heat                  | -0.592     | -0.7957 to -0.3884  | Yes              | ****    | <0.0001          |

**Figure S1.** Process efficiencies of PFCA compounds under heat, no-heat, methanol, and ammonium hydroxide conditions for three concentrations **(A)** 100 ng/L, **(B)** 1,000 ng/L and **(C)** 10,000 ng/L.

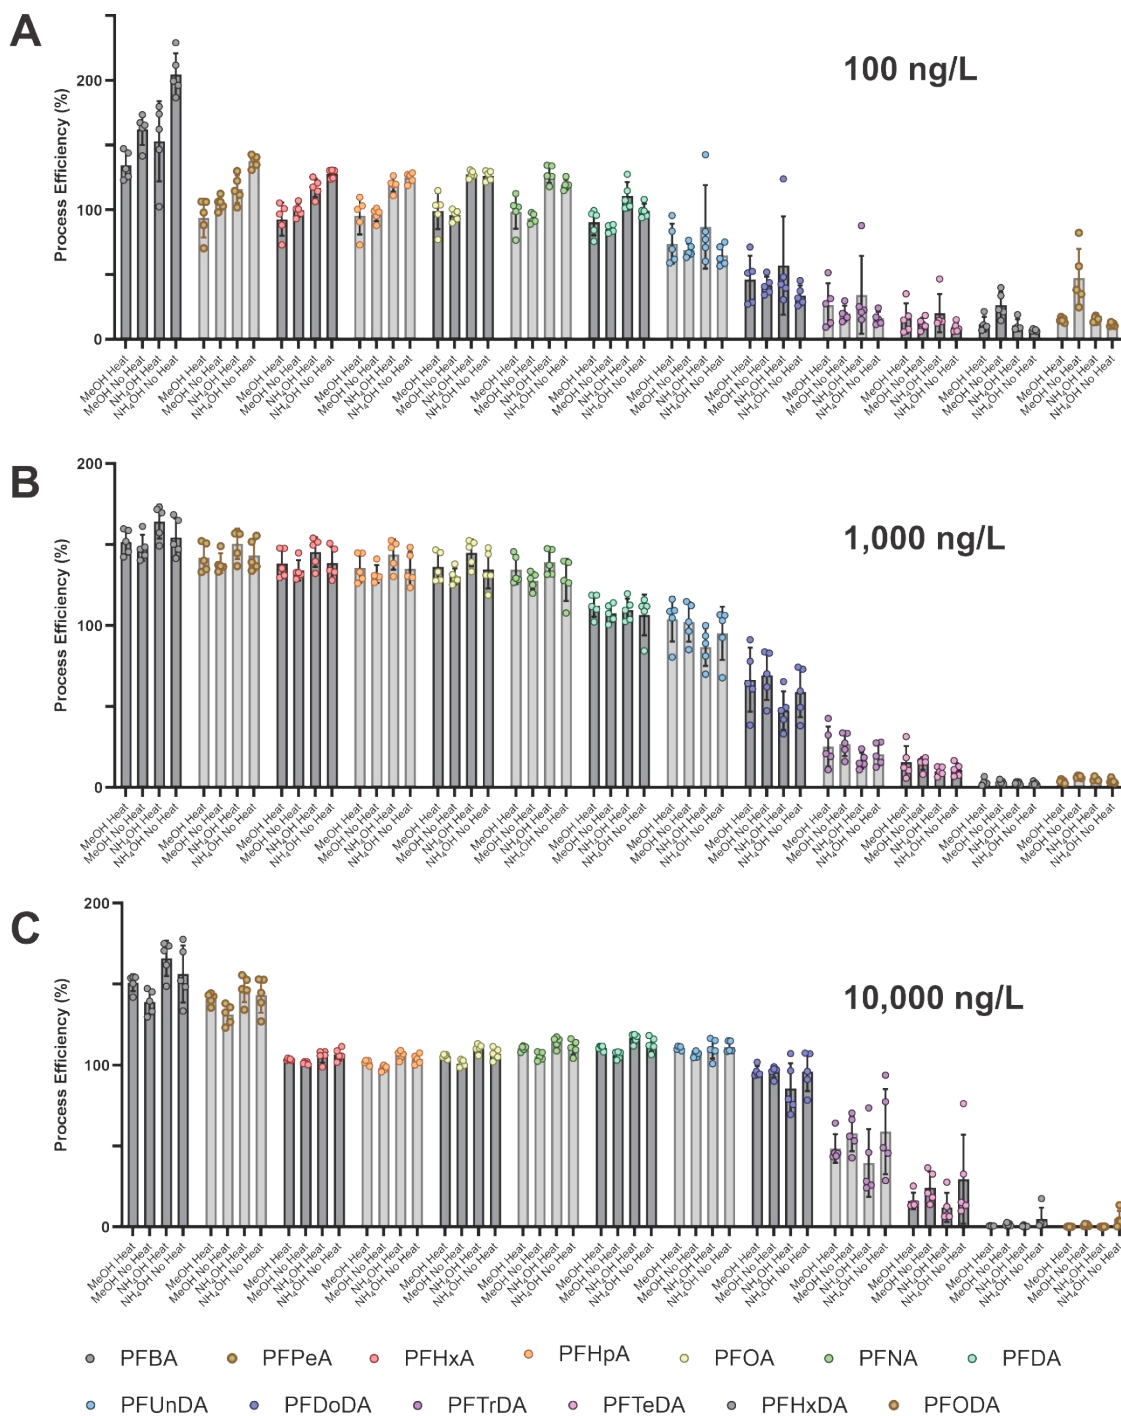

**Figure S2.** Process efficiencies of PFSA compounds under heat, no-heat, methanol, and ammonium hydroxide conditions for three concentrations (A) 100 ng/L, (B) 1,000 ng/L and (C) 10,000 ng/L.

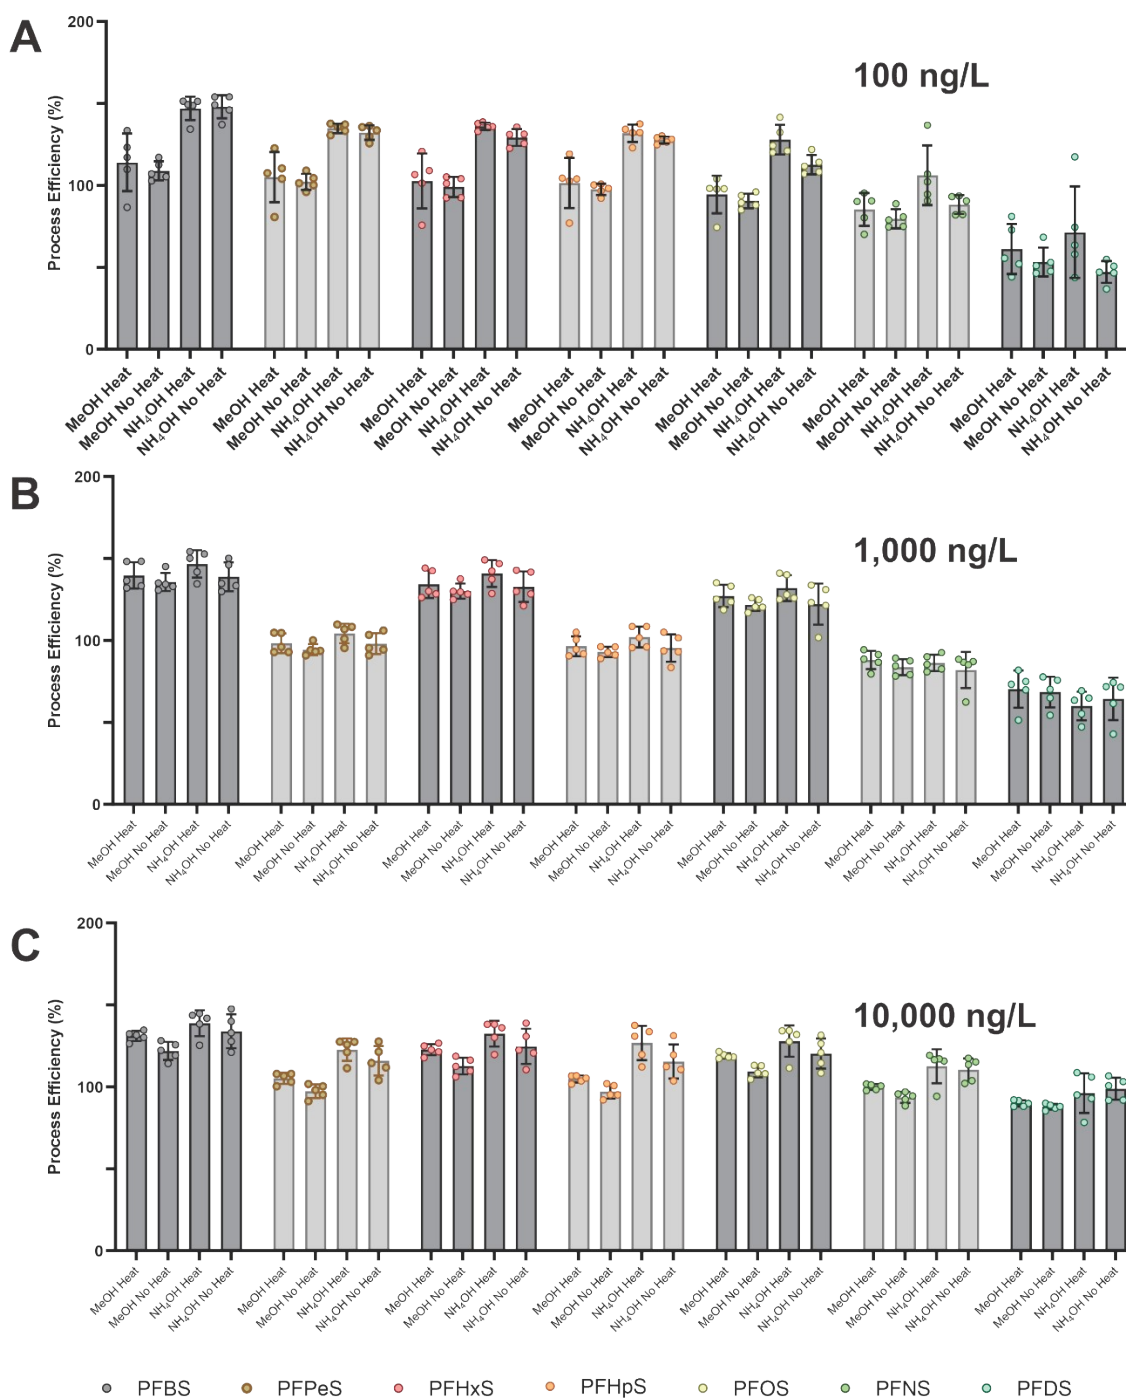

**Figure S3.** Process efficiencies of PFECA compounds under heat, no-heat, methanol, and ammonium hydroxide conditions for three concentrations (A) 100 ng/L, (B) 1,000 ng/L and (C) 10,000 ng/L.

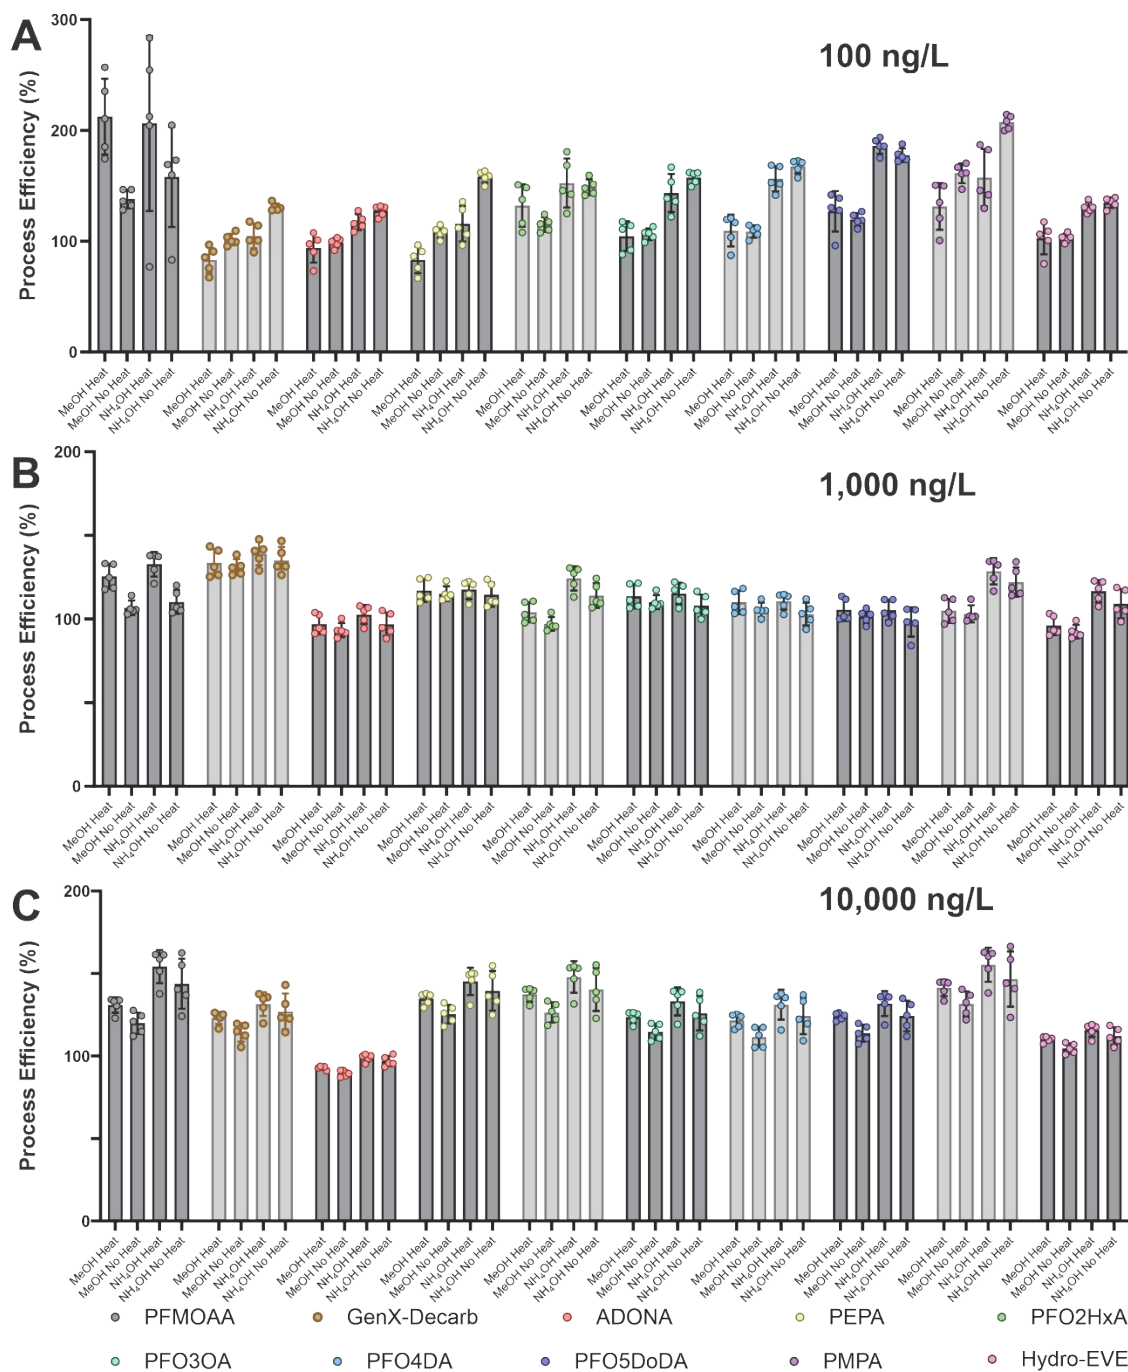

**Figure S4.** Process efficiencies of PFESA compounds under heat, no-heat, methanol, and ammonium hydroxide conditions for three concentrations (A) 100 ng/L, (B) 1,000 ng/L and (C) 10,000 ng/L.

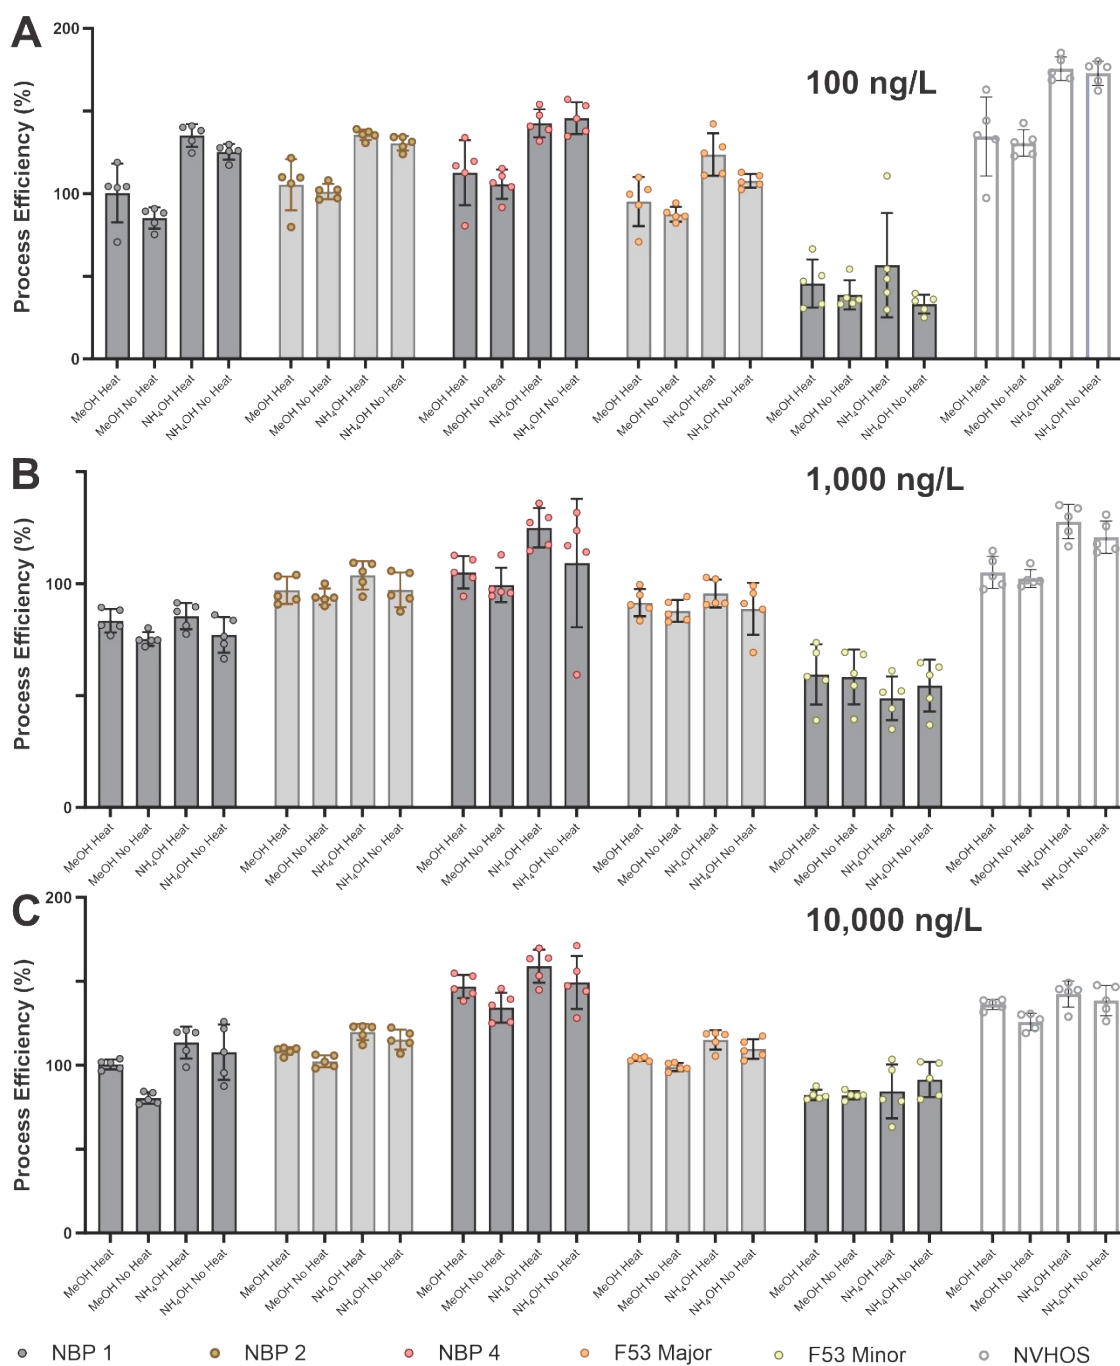

**Figure S5.** Process efficiencies of PFSA<sub>m</sub> compounds under heat, no-heat, methanol, and ammonium hydroxide conditions for three concentrations (A) 100 ng/L, (B) 1,000 ng/L and (C) 10,000 ng/L.

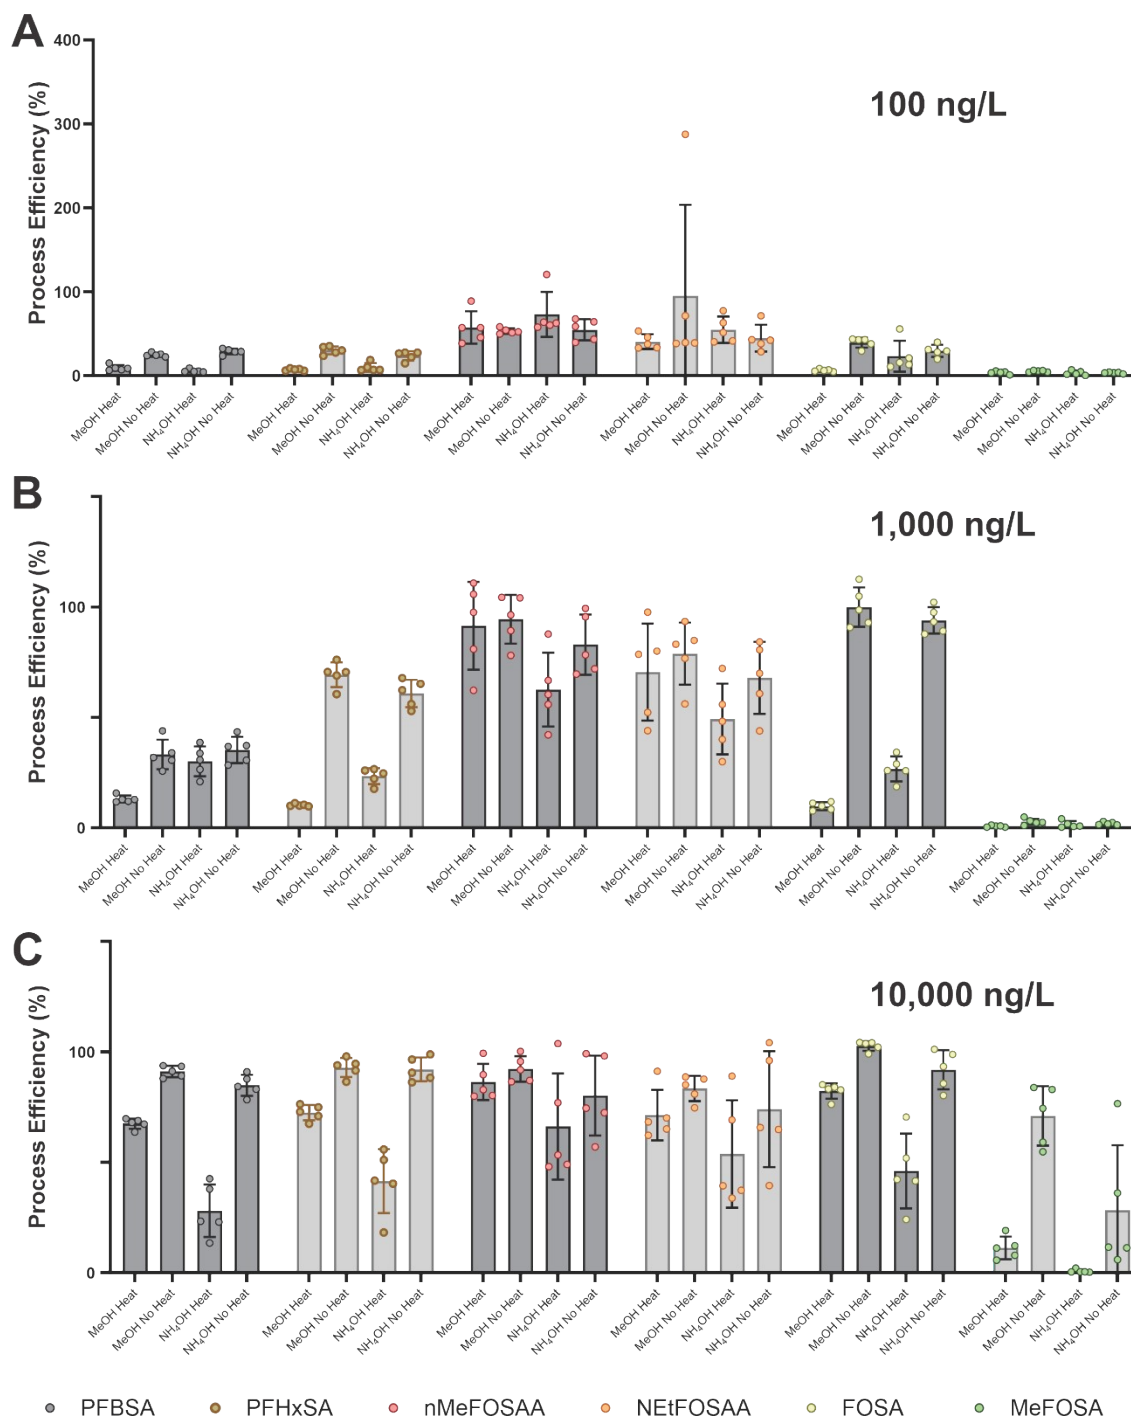

**Figure S6.** Process efficiencies of FTS compounds under heat, no-heat, methanol, and ammonium hydroxide conditions for three concentrations (A) 100 ng/L, (B) 1,000 ng/L and (C) 10,000 ng/L.

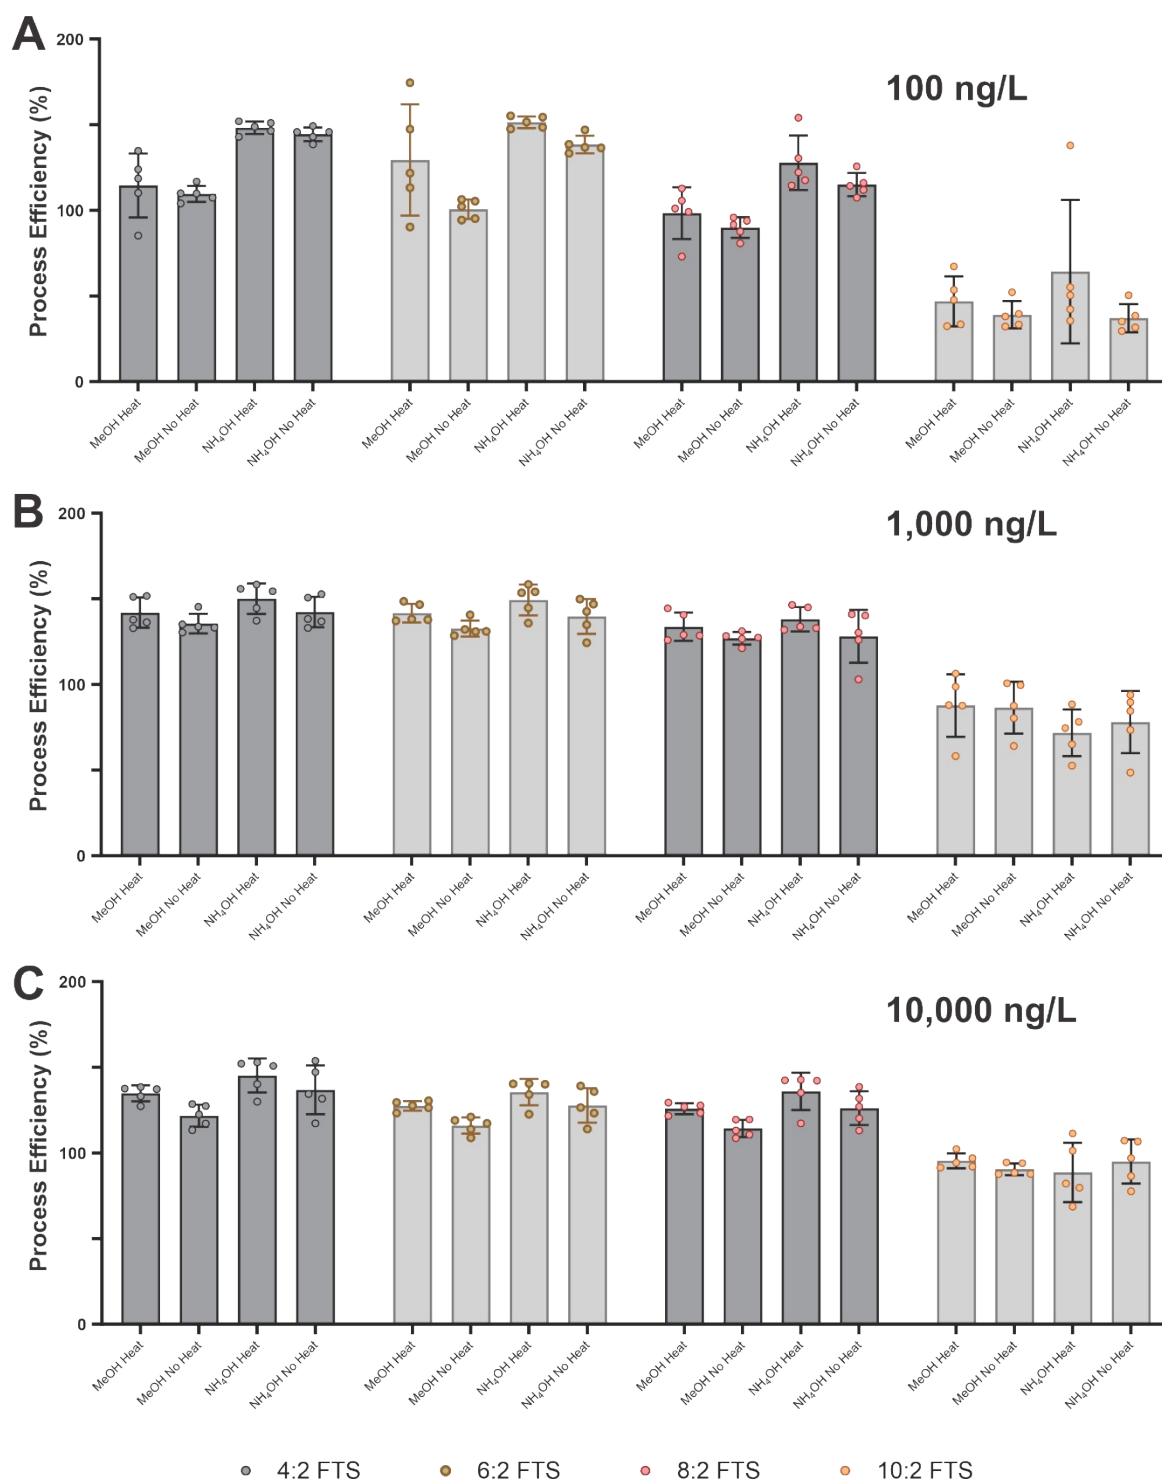

**Figure S7.** Process efficiencies of Zwitterionic compounds under heat, no-heat, methanol, and ammonium hydroxide conditions for three concentrations **(A)** 100 ng/L, **(B)** 1,000 ng/L and **(C)** 10,000 ng/L.

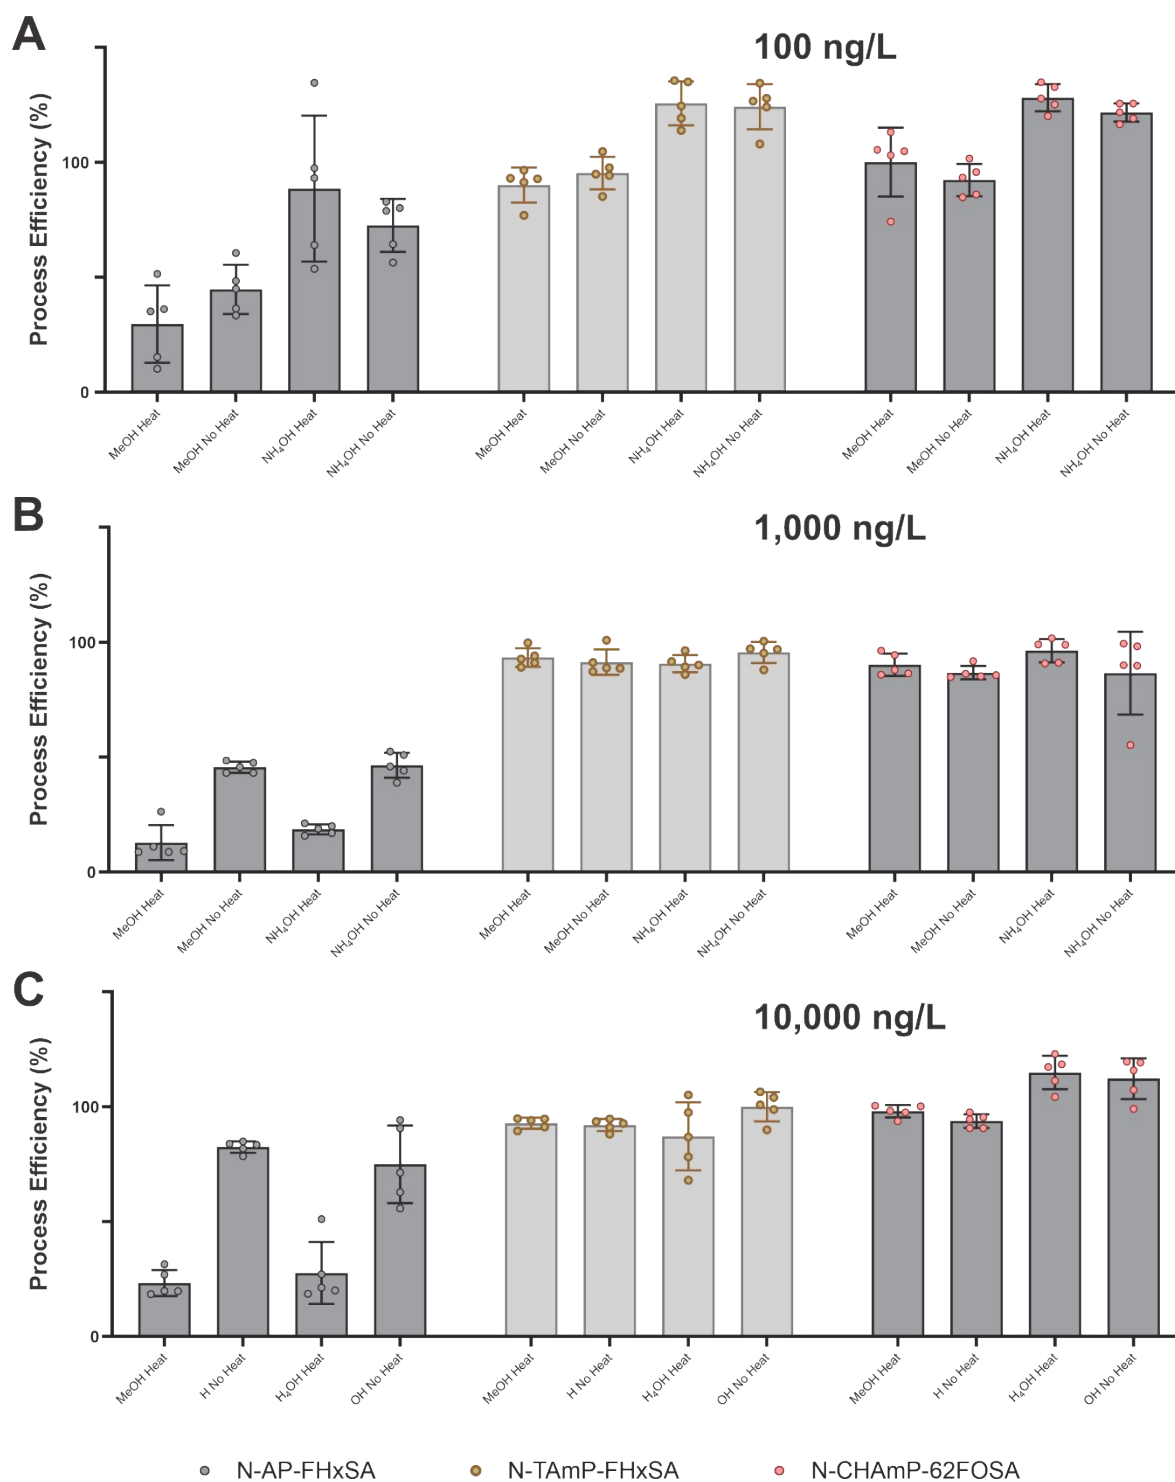



**Figure S8.** Process efficiencies of reconstituting extracts with 1 mL of 50:50 methanol water or 500  $\mu$ L of 100% methanol and then 500  $\mu$ L of 100% water for (A) PFCA & (B) PFSA. All replicates were run in MeOH with no heat applied.

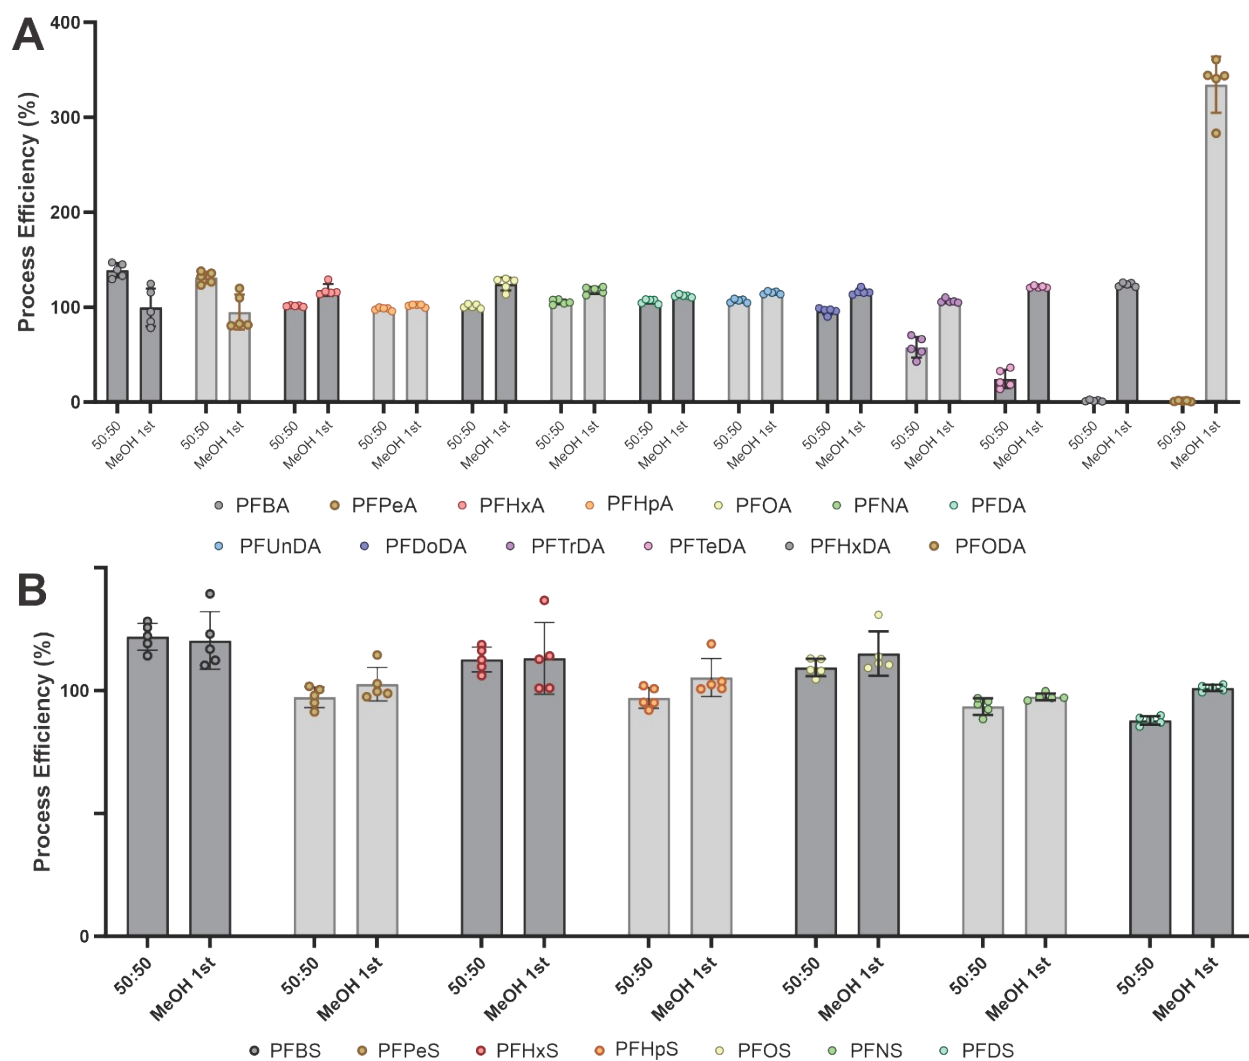

**Figure S9.** Process efficiencies of reconstituting extracts with 1 mL of 50:50 methanol water or 500  $\mu$ L of 100% methanol and then 500  $\mu$ L of 100% water for **(A)** PFECA and **(B)** PFESA. All replicates were run in MeOH with no heat applied.

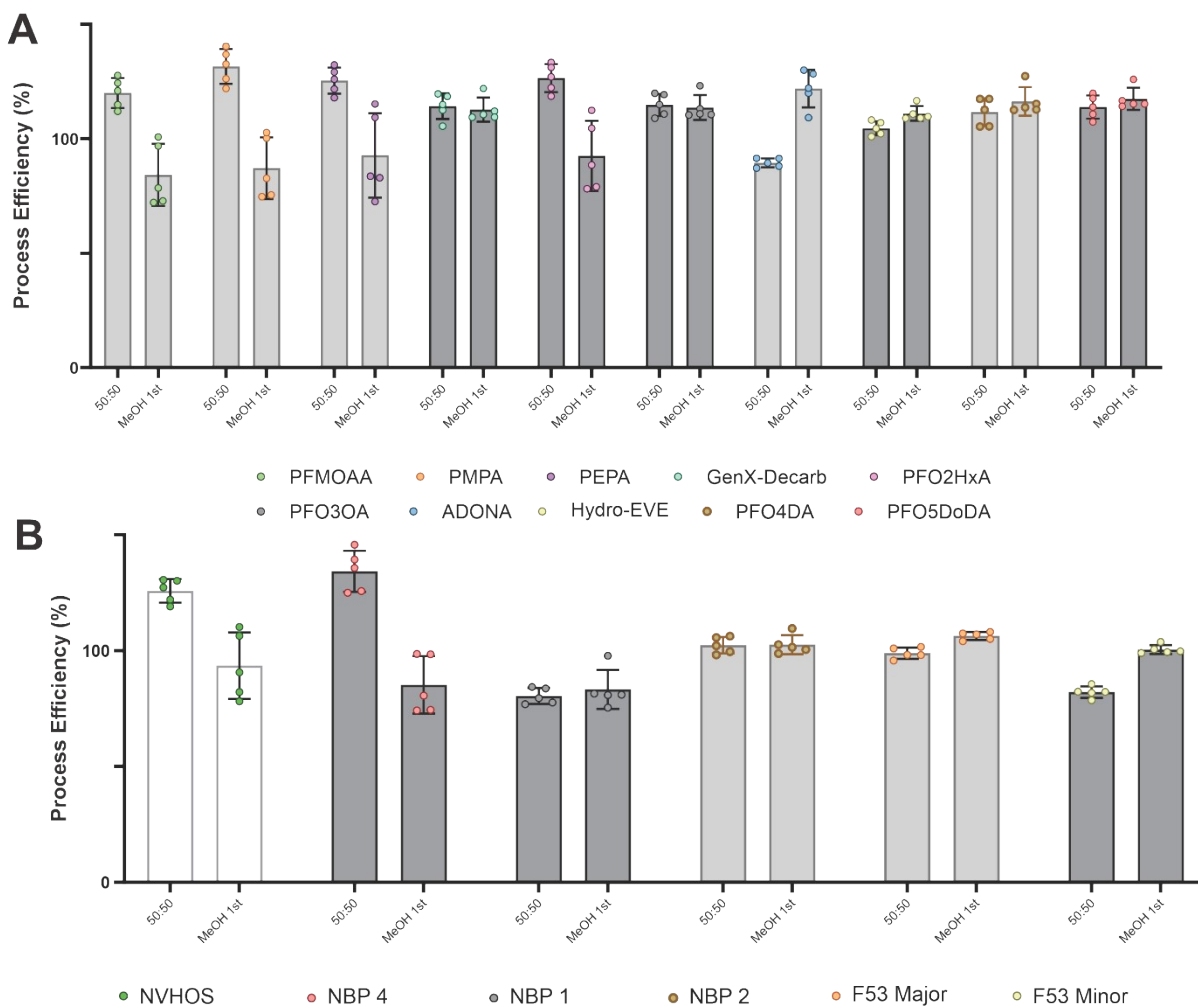

**Figure S10.** Process efficiencies of reconstituting extracts with 1 mL of 50:50 methanol water or 500  $\mu$ L of 100% methanol and then 500  $\mu$ L of 100% water for **(A)** FTS, **(B)** PFSA<sub>m</sub>, & **(C)** Zwitterions. All replicates were run in MeOH with no heat applied.

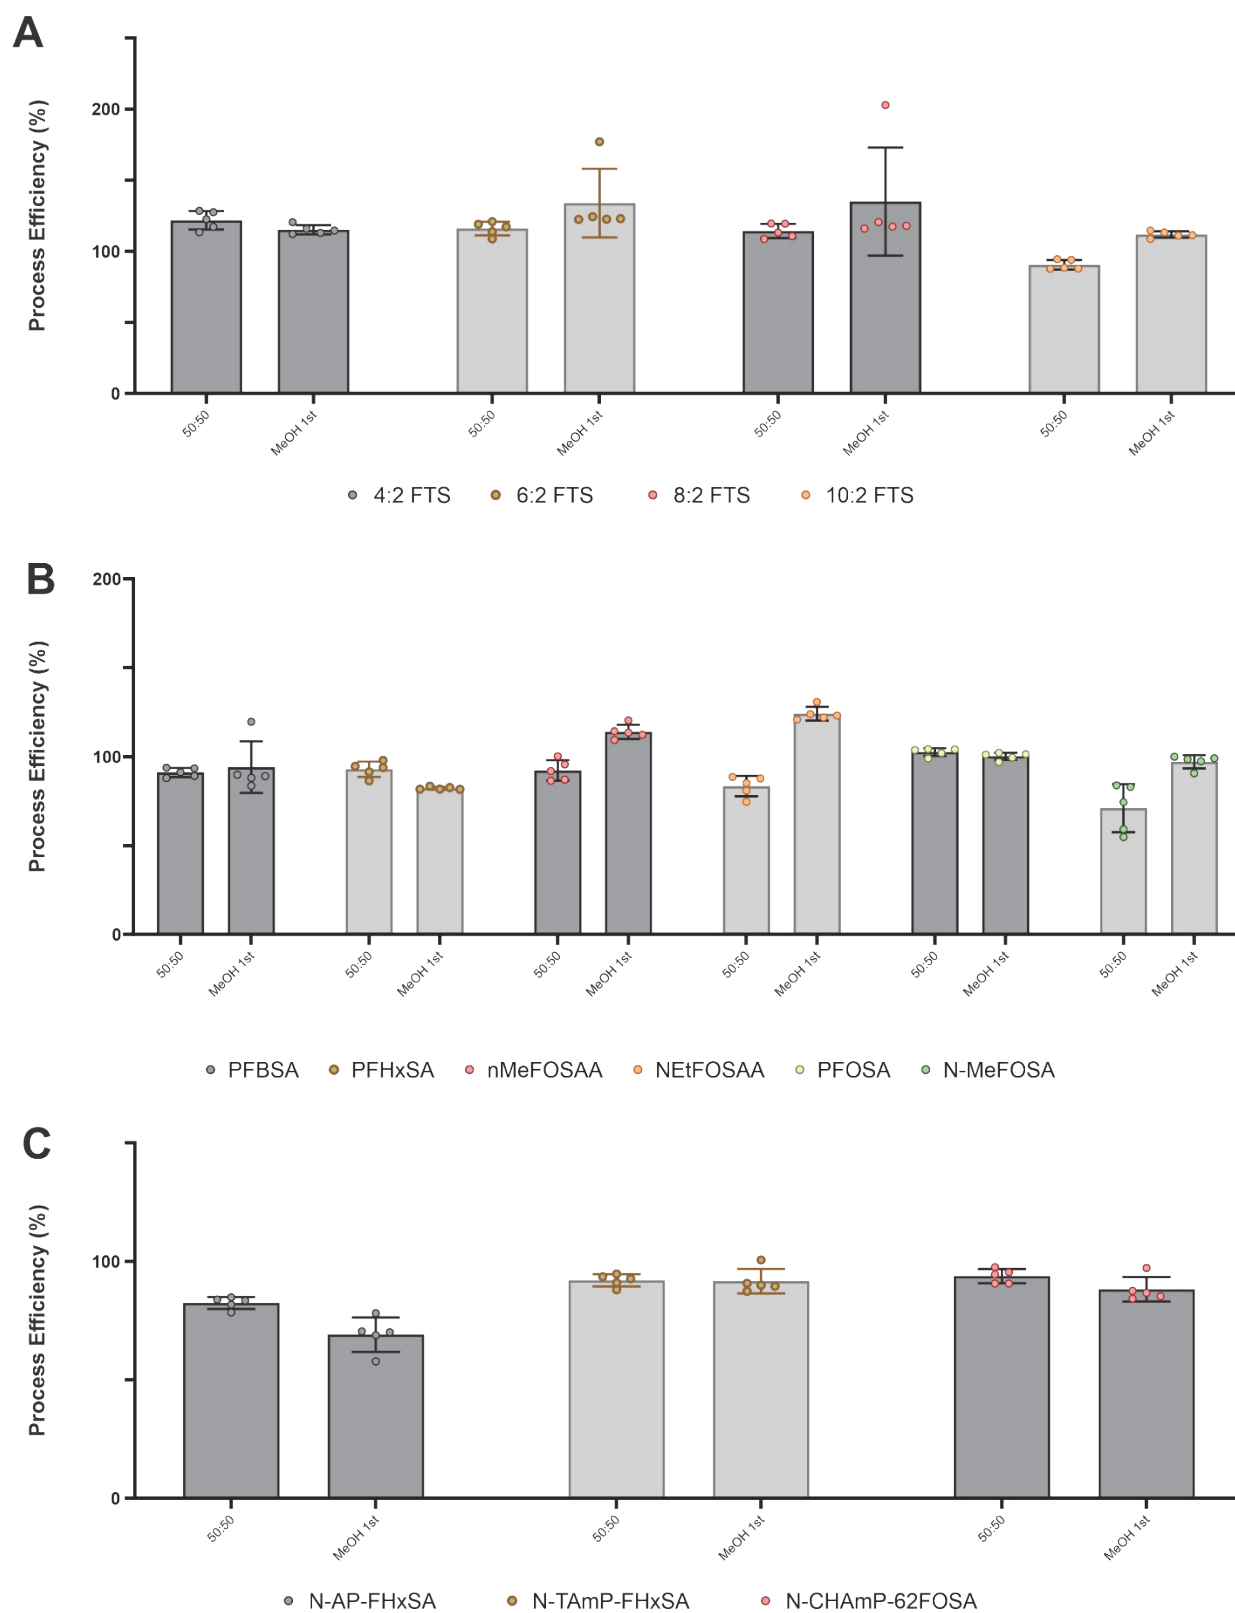

Supplement: d2em00269h1.pdf [file d2em00269h1.pdf]
