# Supplementary material for: Recovery of per- and polyfluoroalkyl substances after solvent evaporation
Source: Royal Society of Chemistry journal article supplement (doi:10.1039/d2em00269h), 2022-01-01
Supplement: d2em00269h2.xlsx [file d2em00269h2.xlsx]

## Sheet: Recovery Study
Row Labels	PFBA	PFPeA	PFHxA	PFHpA	PFOA	PFNA	PFDA	PFUnDA	PFDoDA	PFTrDA	PFTeDA	PFHxDA	PFODA	PFBS	PFPeS	PFHxS	PFHpS	PFOS	PFNS	PFDS	PFMOAA	F53 Major	F53 Minor	PFBSA	PFHxSA	nMeFOSAA	NEtFOSAA	PFOSA	N-MeFOSA	N-AP-FHxSA	N-TAmP-FHxSA	102 FTS	42 FTS	62 FTS	82 diPAP	82 FTS	Adona-Acid Form	GenX-Decarb	Nafion by product 1	Nafion by product 2	Nafion by product 4	N-CHAmP-62FOSA	NVHOS	PEPA	PFO2HxA	PFO3OA	PFO4DA	PFO5DoDA	PMPA
	PFBA	PFPeA	PFHxA	PFHpA	PFOA	PFNA	PFDA	PFUnDA	PFDoDA	PFTrDA	PFTeDA	PFHxDA	PFODA	PFBS	PFPeS	PFHxS	PFHpS	PFOS	PFNS	PFDS	PFMOAA	F53 Major	F53 Minor	PFBSA	PFHxSA	nMeFOSAA	NEtFOSAA	PFOSA	N-MeFOSA	N-AP-FHxSA	N-TAmP-FHxSA	102 FTS	42 FTS	62 FTS	82 diPAP	82 FTS	Adona-Acid Form	GenX-Decarb	Nafion by product 1	Nafion by product 2	Nafion by product 4	N-CHAmP-62FOSA	NVHOS	PEPA	PFO2HxA	PFO3OA	PFO4DA	PFO5DoDA	PMPA
Control_10K ngL- Rep 1	15816597	30931659	36938704	39100440	41374174	42355885	49143832	39253046	38947000	40614446	34330835	19120239	4230423	9932338	7592328	6051119	6607620	6328754	4327354	1313716	3155189	34497080	18638047	6071058	4041444	734289	446483	2639861	573531	8932904	17489311	7913709	9885254	9660661	607457	11646013	46799152	10589740	9068539	45288918	4042986	3154435	5460398	14343957	7141847	7459713	8340008	5299396	7800467
Control_10K ngL- Rep 2	16716546	33840557	38202343	39907223	42197846	42929240	50013656	40678024	40333148	41878330	34644822	17899728	5323254	10922336	7994232	6412794	7008713	6773550	4575124	1377020	3366426	35534244	19623937	6188787	4187269	793079	480202	2864298	532341	9372722	18183148	8483172	10705416	10149223	533155	12406376	47006677	11270483	9725269	47143196	4325838	3398215	5685505	15532504	7814002	7993930	8750772	5578695	8327073
Control_10K ngL- Rep 3	15525229	30373044	36989112	39286583	41675146	42206196	49207434	39382085	39219664	41056608	36199678	21818368	6179073	9940122	7481669	5980782	6653793	6289064	4322594	1314713	3101935	34417618	18700050	5911415	3931063	742486	436220	2670893	600241	8940130	17520060	7924104	9841649	9755200	943076	11539910	47396429	10600955	9125522	44243341	3932180	3155686	5435496	13924066	7100573	7487780	8378803	5371683	7290250
Control_10K ngL- Rep 4	14900606	29419766	36378288	38935888	41453564	41764779	48763454	38637500	38459013	40292929	34890281	22247463	7373686	9509515	7358918	5926357	6496954	6174477	4148216	1276969	2987835	34145528	18249990	5836680	3847832	726245	441635	2668186	650363	8731153	17343576	7687606	9420006	9429240	993703	11034055	47066891	10092444	8732147	42915542	4041669	3018593	5305058	13182838	5994418	7124682	7979714	5145223	7471270
Control_10K ngL- Rep 5	14216640	27718731	34961618	38473716	41381141	41261524	48373006	38150911	37710900	39646078	34692742	23705757	11454346	8771943	7032109	5696172	6398962	6061517	4019857	1239948	2843597	33744784	17708056	5785062	3706618	718612	413968	2595928	628102	8567378	16719707	7338779	8838946	9143336	1341710	10735418	47256823	9569069	8448902	41675306	3690535	2876615	5061385	12725330	6488202	6863240	7687019	4919730	7035687
Avg.	1.54351e+07	3.04568e+07	36694013	39140770	4.16164e+07	4.21035e+07	4.91003e+07	3.92203e+07	38933945	4.06977e+07	3.49517e+07	20958311	6.91216e+06	9.81525e+06	7.49185e+06	6.01344e+06	6.63321e+06	6.32547e+06	4278629	1.30447e+06	3.091e+06	3.44679e+07	18584016	5.9586e+06	3.94285e+06	742942	443702	2.68783e+06	596916	8.90886e+06	1.74512e+07	7869474	9.73825e+06	9627532	883820	1.14724e+07	4.71052e+07	1.04245e+07	9.02008e+06	4.42533e+07	4.00664e+06	3.12071e+06	5.38957e+06	13941739	6.90781e+06	7385869	8.22726e+06	5.26295e+06	7.58495e+06
Recon_10,000 ngL- Rep 2-18Nov21	13095568	24805968	42438292	51826047	54150466	50759222	54974689	45611623	44083427	43037076	42134053	25539083	23544075	11027593	7699664	6072821	6877290	7199812	4156771	1337853	2229441	37258113	18680589	5306932	3222914	843685	536197	2746297	588678	6246328	15694103	8918013	11277353	11971453	1669457	13825408	61231012	11684570	7345829	44474995	2973433	2730833	4427488	11558585	5398224	8351857	9481511	6136396	5661716
Recon_10,000 ngL- Rep 3-18Nov21	17829459	33418173	42311995	46068864	47235443	47337233	54089344	44609047	45122289	43210041	42081796	26297231	23758046	13675621	7304786	6780905	6676400	7022806	4151009	1321607	2992713	35882879	18533179	5353049	3289513	848947	549819	2672336	596791	6283083	15834467	8757986	11162645	11831044	1810616	13526172	51425844	11520879	7304463	45401425	3943730	2706300	5733632	15229248	7219860	8153335	9351354	6062620	7600826
Recon_10,000 ngL- Rep 4-18Nov21	12076849	25149740	41667427	50568950	53582553	50172320	55034604	45242272	44945264	42661618	42162363	25941835	24928512	10824402	7463532	6071101	6797360	6986671	4106624	1295272	2251406	36881147	18396260	5250341	3258261	812482	541788	2726996	591504	6133555	15620359	8735670	11007251	11794136	1950612	13303072	60418946	11410930	7288877	43686342	2980795	2659082	4210520	11656293	5453198	8164849	9257533	6009792	5722555
Recon_10,000 ngL- Rep 5-18Nov21	14657525	24524843	42696843	48746241	50571337	48616227	54652638	44610539	44874876	42945869	42551051	26393604	23780491	11467009	7402943	6859243	6690391	6908154	4162201	1307903	2425094	36214724	18474790	4983182	3218534	835004	546410	2719769	541199	5151641	15247230	8561549	10918388	11789185	1876095	13459747	56483319	11402458	6803781	44910588	3228760	2630699	4886302	10117574	6111567	8187297	9273806	6059831	6272452
Recon_10,000 ngL- Rep 6-18Nov21	19242027	36511998	47341110	50698202	53223833	51117174	55878475	45810759	47300861	44832846	42950547	25439857	19566885	12076311	8573463	8218849	7892763	8274730	4268770	1328434	3114271	37042753	19274776	7131598	3222808	894650	580267	2605344	581797	6957158	17546530	9020628	11737806	17042748	1567008	23272421	57501873	12708827	8818482	48481837	3949082	3032517	5942416	16058320	7762515	9093526	10473956	6627889	7786265
[truncated: 1 more columns]

## Sheet: Evaporative Loss Peak Areas
	PFBA	PFPeA	PFHxA	PFHpA	PFOA	PFNA	PFDA	PFUnDA	PFDoDA	PFTrDA	PFTeDA	PFHxDA	PFODA	PFBS	PFPeS	PFHxS	PFHpS	PFOS	PFNS	PFDS	PFMOAA	F53 Major	F53 Minor	PFBSA	PFHxSA	nMeFOSAA	NEtFOSAA	PFOSA	N-MeFOSA	N-AP-FHxSA	N-TAmP-FHxSA	102 FTS	42 FTS	62 FTS	82 diPAP	82 FTS	Adona-Acid Form	GenX-Decarb	Nafion by product 1	Nafion by product 2	Nafion by product 4	N-CHAmP-62FOSA	NVHOS	PEPA	PFO2HxA	PFO3OA	PFO4DA	PFO5DoDA	PMPA
Control_100 ngL- Rep 1	109199	281382	349762	427735	516954	532406	738011	363033	336368	311985	201999	62125	12182	113981	79958	65661	81613	59880	39735	9971	27879	360301	144018	88295	46043	7064	3178	27136	5314	71555	154430	51074	84993	100725	1684	91431	653752	97485	100603	451295	26989	25267	46931	157580	53661	77039	85100	55284	53
Control_100 ngL- Rep 1-9Nov21	106312	228707	315708	392858	512085	547210	827323	571908	774578	952731	841085	320893	53009	107526	67304	58881	73501	59511	44049	14021	21929	365628	229697	83423	42403	16659	9231	31173	8689	72721	186229	99346	78804	109120	27956	108781	613058	84850	92685	374617	26137	27412	30182	130250	43911	66010	77203	52514	38371
Control_100 ngL- Rep 2-9Nov21	105472	230161	307511	392490	501867	528480	777300	450932	528530	595348	509259	305003	57668	88314	69165	61072	76884	61679	43078	13014	16666	356982	203463	82906	43355	11706	9123	27046	7189	72156	164200	77706	80323	103961	11592	106569	611139	85117	88067	377086	25505	24291	27571	128841	42313	63543	75566	54036	38989
Control_100 ngL- Rep 4	103928	259730	334156	414185	513033	533144	740641	368923	350585	332795	227376	98036	28244	111522	74905	61537	78807	59976	38467	10483	27747	358519	141345	89467	44520	7062	3102	26289	4710	72641	159754	56129	85370	108832	3529	97686	640042	91385	92529	429303	27230	26947	44660	151291	50017	75340	84105	61318	49184
Control_100 ngL- Rep 5	118460	267442	339542	418179	511075	536124	736786	360843	319388	286469	173021	62874	18785	112009	76370	63856	79956	61898	38946	10352	28003	365558	142353	88632	45695	6849	3463	26177	5231	73883	162232	50780	88983	106525	2077	99919	639690	95598	94380	431306	27024	25593	46372	151909	51393	77026	82746	54663	50172
Control_1,000 ngL- Rep 1	1469931	2765344	3453589	4237763	5330238	5486805	7983643	3891313	3697824	3915383	2119264	698656	96896	1053219	849812	638477	885442	615462	467994	126844	331428	4207826	1703639	920437	499541	63850	42364	253523	27873	821562	1869720	582609	899906	1028409	25813	1008034	7671390	957483	1097620	5018414	434233	299652	715014	1691316	782227	834472	936121	652243	796415
Control_1,000 ngL- Rep 2	1354696	2558887	3209731	4015045	4973490	5226716	7530975	3531583	3268245	3434178	1956207	701838	87938	973268	806031	597244	852779	582652	431696	117796	298257	4058868	1567680	886337	474641	61665	36978	249944	38086	810801	1848370	526525	834439	966815	15131	956568	7191507	891181	1035050	4680788	399569	286517	656912	1568299	728441	778038	886396	622073	752354
Control_1,000 ngL- Rep 3	1412056	2854293	3541024	4373492	5403644	5682642	8088485	3833661	3526614	3550355	1847970	549217	64658	1083333	874553	652857	915492	625792	473570	126422	339002	4290300	1676951	933915	508015	66827	41663	247265	20421	835412	1857182	568917	923884	1052016	25210	1043374	7953090	993802	1105917	5122531	437347	311634	729647	1742577	810616	862035	955867	664222	838183
Control_1,000 ngL- Rep 4	1362117	2739129	3419322	4202179	5322184	5486088	7871672	3838302	3589560	3812905	2112243	593223	68322	1038952	858660	636380	896451	618140	453358	123815	322831	4220948	1691664	910106	493821	63430	39339	248464	30280	808332	1874171	583559	896877	1018880	18830	1019050	7642056	938814	1090606	5007436	456329	301863	705748	1664856	778391	830914	922673	636968	807103
Control_1,000 ngL- Rep 5	1380541	2605141	3243704	4040087	5058847	5271323	7828072	3795678	3530920	3640377	1976405	531393	63438	996946	818261	613250	855887	594629	450938	123065	311530	4067867	1682405	887201	487905	64946	36035	244446	37353	820479	1833054	578745	865291	980789	12953	1002704	7194301	907948	1055030	4811693	397894	287794	672849	1594323	744236	788601	906997	631367	773801
Control_10,000 ngL- Rep 1	15816597	30931659	36938704	39100440	41374174	42355885	49143832	39253046	38947000	40614446	34330835	19120239	4230423	9932338	7592328	6051119	6607620	6328754	4327354	1313716	3155189	34497080	18638047	6071058	4041444	734289	446483	2639861	573531	8932904	17489311	7913709	9885254	9660661	607457	11646013	46799152	10589740	9068539	45288918	4042986	3154435	5460398	14343957	7141847	7459713	8340008	5299396	7800467
Control_10,000 ngL- Rep 2	16716546	33840557	38202343	39907223	42197846	42929240	50013656	40678024	40333148	41878330	34644822	17899728	5323254	10922336	7994232	6412794	7008713	6773550	4575124	1377020	3366426	35534244	19623937	6188787	4187269	793079	480202	2864298	532341	9372722	18183148	8483172	10705416	10149223	533155	12406376	47006677	11270483	9725269	47143196	4325838	3398215	5685505	15532504	7814002	7993930	8750772	5578695	8327073
Control_10,000 ngL- Rep 3	15525229	30373044	36989112	39286583	41675146	42206196	49207434	39382085	39219664	41056608	36199678	21818368	6179073	9940122	7481669	5980782	6653793	6289064	4322594	1314713	3101935	34417618	18700050	5911415	3931063	742486	436220	2670893	600241	8940130	17520060	7924104	9841649	9755200	943076	11539910	47396429	10600955	9125522	44243341	3932180	3155686	5435496	13924066	7100573	7487780	8378803	5371683	7290250
Control_10,000 ngL- Rep 4	14900606	29419766	36378288	38935888	41453564	41764779	48763454	38637500	38459013	40292929	34890281	22247463	7373686	9509515	7358918	5926357	6496954	6174477	4148216	1276969	2987835	34145528	18249990	5836680	3847832	726245	441635	2668186	650363	8731153	17343576	7687606	9420006	9429240	993703	11034055	47066891	10092444	8732147	42915542	4041669	3018593	5305058	13182838	5994418	7124682	7979714	5145223	7471270
Control_10,000 ngL- Rep 5	14216640	27718731	34961618	38473716	41381141	41261524	48373006	38150911	37710900	39646078	34692742	23705757	11454346	8771943	7032109	5696172	6398962	6061517	4019857	1239948	2843597	33744784	17708056	5785062	3706618	718612	413968	2595928	628102	8567378	16719707	7338779	8838946	9143336	1341710	10735418	47256823	9569069	8448902	41675306	3690535	2876615	5061385	12725330	6488202	6863240	7687019	4919730	7035687
MeOH_100 ngL- Rep 1_Heat	135487	237493	300680	380399	495941	544551	733857	347690	238641	159446	70242	15846	3421	117040	76485	62988	80180	59221	38918	9371	45219	370636	114573	6170	2594	8764	2993	2337	278	25496	153378	45056	92176	119840	1431	102010	570844	68792	97707	438101	29957	26682	51998	109254	56093	66065	83728	71014	42730
MeOH_100 ngL- Rep 2_Heat	129440	263560	329744	421404	532402	550870	714069	303745	171617	85567	29689	8233	2503	124868	78975	66254	81233	59453	36828	8425	57477	360230	86859	7382	2632	5642	2574	1453	353	26172	153838	35868	99205	184690	743	106629	615798	77730	97622	453672	31062	27303	52977	124417	71571	81898	96942	77193	47716
MeOH_100 ngL- Rep 3_Heat	148217	286633	343887	432614	531177	526773	621588	214579	95308	39309	15493	6645	3158	131377	81175	67770	81591	59361	32796	5113	62766	336651	52684	7928	3514	4487	2107	1299	216	11038	159608	21677	103748	128799	434	99982	638263	87933	97064	452817	31770	27154	56438	138950	72818	84342	94496	72398	53181
MeOH_100 ngL- Rep 4_Heat	151591	285748	358728	460211	589286	600304	706387	225121	90740	29176	11287	5135	2835	142333	90205	75109	93130	62955	36978	6017	51461	396866	57309	12895	3972	3799	1865	1875		37338	150977	22428	112777	156056	289	113781	679608	82450	111386	501592	35587	29290	63771	130636	66382	79544	97750	78760	52962
MeOH_100 ngL- Rep 5_Heat	126523	189193	248295	305716	395079	408559	557912	253204	175482	97292	35934	7315	2842	92317	59327	47043	60127	45059	28628	6420	42646	256055	80984	5662	3218	5633	1870	1644	64	7315	127167	32007	71337	95539	896	73673	461800	61218	66257	329484	21406	19216	38096	95819	52063	63276	70634	53415	35580
MeOH_1,000 ngL- Rep 1_Heat	1986538	3596392	4367860	5256835	6684533	6874415	8776631	4390696	3209741	1563185	627303	40419	3870	1358460	781301	792387	798591	760504	403687	101174	377517	3717374	1226163	116102	49114	71058	38325	24555	251	71339	1688755	603897	1174932	1383750	2720	1297055	6872899	1174353	873504	4474176	400849	255351	678673	1815179	751451	872303	959268	643847	769057
MeOH_1,000 ngL- Rep 2_Heat	2228618	4115069	4980201	6037350	7649990	7907098	9329760	3949399	2139969	697889	209308	11979	2998	1526360	879709	904662	925287	820671	429405	90542	426885	4150131	974290	142716	49511	51895	17261	20797	85	215074	1745731	499916	1341076	1499180	596	1452711	7716164	1344757	962749	5119946	470546	286374	797943	2046832	846434	994482	1089608	728042	893876
MeOH_1,000 ngL- Rep 3_Heat	2029396	3642564	4414572	5380914	6661006	6976249	8639829	4103297	2740456	1185643	367228	15214	2818	1371989	781782	805884	833361	750573	394670	92724	379993	3774833	1149679	116515	55226	67805	30846	29543	254	74792	1721383	560666	1204736	1390579	852	1293063	6936122	1184829	828051	4584977	436749	261611	694010	1859091	762490	881231	951362	641554	786496
MeOH_1,000 ngL- Rep 4_Heat	2214149	4075217	4984913	6044299	7565760	7713633	9328132	4123987	2260748	764242	243052	17964	2745	1525434	881376	894185	884910	808245	416134	86363	425766	3961012	946388	106382	51556	62569	31423	27754	391	90453	1852026	497674	1335731	1479694	1164	1414285	7821575	1322098	950007	5094003	478927	280912	766222	2059675	849917	990495	1073942	717139	886914
MeOH_1,000 ngL- Rep 5_Heat	2120181	3785575	4562635	5548288	6946353	7013329	8028736	3037556	1354252	400538	113359	7219	1890	1404404	808733	816202	808978	720772	362523	63580	400105	3481179	648748	109087	47944	39915	20522	19046	83	71801	1653940	330238	1218112	1393797	530	1265950	7111764	1229010	877509	4654797	446553	257024	720162	1883421	789279	910688	990162	650471	825260
MeOH_10,000 ngL- Rep 1_Heat	23720973	43358594	37753548	40146038	44255964	47085500	54862604	43468520	36433729	17618034	4980226	99198	18038	12914623	7991332	7371968	7077010	7563313	4300755	1171917	4137379	35773890	15130727	3796334	2658403	615414	303125	2049736	34074	1636382	15607838	7246161	13370402	12283690	1755	14660639	43694305	12945326	9362159	48654045	6197860	3044642	7397489	19111677	9644358	9262484	10312965	6640102	10975106
MeOH_10,000 ngL- Rep 2_Heat	21890302	41248776	37746320	38829697	42970212	45371459	53073730	42666007	39577430	26090898	8789371	181786	8840	12403562	7513315	7086483	6743995	7419973	4209057	1194294	3798940	35423040	16272383	4101782	2795248	737714	404746	2235537	73275	1761100	15909050	8048742	12397101	11870190	2896	13949704	42868364	12155452	8711077	46305631	5541337	2923479	7094593	18018994	9010627	8705276	9550058	6367703	10108242
MeOH_10,000 ngL- Rep 3_Heat	23198440	42574598	37903357	39698904	43594854	46165366	54168026	43038730	36633222	18597970	5001829	105400	4309	12776036	7717757	7298350	6874214	7476909	4178862	1149790	4032207	35302265	14815198	4158814	2954736	593640	288732	2289566	114135	2798605	16412102	7198510	12961337	12171140	1980	14151062	43861353	12865975	8866174	47853793	5720577	3064824	7266291	18459235	9346934	9005672	9698361	6452968	10569054
MeOH_10,000 ngL- Rep 4_Heat	23792642	43924039	38210121	40192825	44021402	46793982	54766006	43802014	37381831	18468760	4592911	103846	4427	13213633	8077793	7510596	7081856	7685154	4354960	1200945	4148404	36167908	15292973	4053085	2874673	596220	276032	2225171	47215	1755166	16544138	7629940	13479388	12469513	2458	14843000	44075914	13153594	9190106	48443033	6132287	3132216	7482768	19223609	9699146	9322356	10207278	6565929	10985876
MeOH_10,000 ngL- Rep 5_Heat	23785414	43598815	38027742	40248631	44333954	46782728	54772816	43646076	36710452	17785689	4741639	103484	4575	12991043	8084715	7614880	6986770	7470631	4327941	1147265	4118304	36157131	14932473	4011969	3009990	666038	310979	2258377	66966	2400456	16516003	7424713	13400855	12560090	2653	14561508	44181942	13049170	9158483	48844391	5826716	3125233	7469897	19082946	9724986	9331142	10267107	6614659	10945227
MeOH_100 ngL- Rep 1_No Heat	172160	276891	331378	399595	477222	487177	621297	260246	146904	58626	23375	29623	16221	114142	73654	57499	75492	54141	30504	5504	32342	312097	63688	20711	13376	5739	4009	11797	272	26363	156761	21576	89903	100719	5743	81450	613761	90314	77156	401624	27684	22262	48490	153723	53167	74625	86060	66029	56845
MeOH_100 ngL- Rep 2_No Heat	168017	285968	343516	415859	499976	487513	616397	240448	136044	61674	27924	24986	11119	112233	76768	64698	76716	53328	32238	5889	33278	311622	61702	22289	15144	5357	2149	11845	349	35082	161422	26526	91946	111546	4177	92442	640147	94188	82741	421158	29386	24174	51977	158956	55748	77349	89190	65417	58964
MeOH_100 ngL- Rep 3_No Heat	178520	302546	365086	425538	516721	522198	646720	243183	122530	52812	20316	15661	7531	124877	80110	65367	78743	56819	33009	6135	35831	320500	57110	24526	15641	5171	2197	12032	385	32599	173090	25501	97783	112514	3664	94675	651679	99452	83642	445859	30611	26313	55842	165521	59973	81165	92681	70395	60220
MeOH_100 ngL- Rep 4_No Heat	145815	285731	342727	412021	505760	514961	653504	278447	173866	92128	36988	16983	6890	119947	74524	62913	78304	58171	36279	7901	35832	340906	93480	19390	10532	5053	2213	8122	260	43911	140717	34959	91989	108169	2770	96664	629701	90738	85113	422561	28319	24794	51278	157268	56621	77061	90760	68463	57140
MeOH_100 ngL- Rep 5_No Heat	170290	264100	317603	369330	461922	474139	604397	229793	114848	41965	12167	10685	4860	109618	70590	57460	72014	51535	30579	5369	31340	297038	57935	21010	12244	4902	16166	10421	378	24213	155805	22346	87080	99787	2293	88470	580280	86717	70485	397990	24371	21950	48024	144273	51902	70968	81316	61647	51935
MeOH_1,000 ngL- Rep 1_No Heat	2249418	4027371	4885455	5888995	7195252	7112652	8181594	3211342	1665010	584725	161500	14404	5527	1493279	842805	863393	847675	730807	356520	67105	365836	3500782	654976	277902	339802	50061	22021	225729	316	396857	1871672	363847	1284860	1419058	1998	1290208	7551101	1298743	864500	4932936	480202	272773	760034	2027677	798739	960512	1031245	662246	887498
MeOH_1,000 ngL- Rep 2_No Heat	2000673	3716055	4475946	5444507	6735433	6787047	8437753	3861832	2467265	1003565	325479	22578	5002	1390078	788253	805371	803697	732195	384153	86717	338460	3600954	998054	288953	347629	61815	32638	245313	758	373879	1691664	497292	1194320	1322462	2023	1273674	7014021	1226146	805626	4589466	409565	252443	707201	1895392	744273	893437	967765	637853	806267
MeOH_1,000 ngL- Rep 3_No Heat	2053102	3683805	4434800	5426557	6684678	7003436	8806298	4240067	2943836	1223881	309913	12761	4269	1381586	791786	813156	816898	758260	398609	96025	336156	3819386	1153619	308093	347269	66770	36699	260637	981	389553	1647488	565288	1182105	1321571	1117	1281663	6916737	1185142	804205	4620457	401617	256455	700978	1862007	734351	887087	967036	658911	805576
MeOH_1,000 ngL- Rep 4_No Heat	2070646	3696236	4473593	5460038	6857393	7244189	8961573	4333757	2919547	1231231	366631	17152	4567	1369186	784798	815932	846510	765163	406092	93630	339542	3930384	1138008	398108	374658	66909	33326	279862	1489	353305	1619468	571629	1177268	1333091	1502	1319324	6992933	1235208	806031	4630572	407557	254914	704891	1889717	735095	895646	971081	682429	803461
MeOH_1,000 ngL- Rep 5_No Heat	1956329	3604108	4338407	5283735	6520683	6507453	7894906	3641831	2183584	856002	310655	30371	5313	1345462	765583	784251	783855	709999	360291	80254	329605	3459846	907794	232734	298145	57274	30125	230912	714	353460	1644744	456428	1153012	1296896	2497	1219134	6666872	1193344	773927	4439307	414570	253234	688099	1840237	714905	870104	920353	612467	784800
MeOH_10,000 ngL- Rep 1_No Heat	20537573	38540914	37406861	38085625	41727339	43702219	51222567	41119009	38496314	28627323	12713816	395799	70849	11701351	7124865	6599825	6315340	6832203	3951794	1172912	3549414	33800313	15909148	5312668	3608723	744364	393317	2743726	500425	7277119	15882439	7429488	11409146	10961798	4383	12696364	41454613	11724307	6935698	44058521	5007781	2828028	6576946	16962425	8448117	8183239	8670905	5827153	9568727
MeOH_10,000 ngL- Rep 2_No Heat	21523821	40326842	37396371	38703050	41540613	44213847	52927558	42305460	37371055	21637270	6363367	160583	33352	11998185	7344238	6762985	6305139	6860051	4040561	1135239	3738411	33845457	15273688	5437750	3702470	710597	389259	2800377	444249	7468685	16521729	6961634	11927702	11289666	3241	12972705	42133845	11982435	7171669	45185559	5581907	2948429	6860340	17562683	8775505	8486649	9265260	5989035	10053784
MeOH_10,000 ngL- Rep 3_No Heat	22720319	42046867	37105748	39087248	43053436	45549095	52852512	41993795	35021137	17340121	4815061	125240	23136	12576704	7618910	7138753	6766031	7152447	4148002	1147862	3946691	35035734	14601511	5569320	3862801	646971	331424	2801120	326666	7434665	16320131	6909179	12511039	11642293	2312	13704810	43063399	12466201	7610184	47019082	5836119	3042440	7035525	18433750	9208405	8847909	9654891	6304840	10646975
MeOH_10,000 ngL- Rep 4_No Heat	22403431	41309872	37018855	38664896	42771516	45346825	53067680	42665765	37766687	22789049	7253875	229076	108428	12338544	7518894	6990671	6684298	7138459	4090732	1159429	3842797	34802764	15296072	5587851	3729790	682530	359018	2787871	352950	7554803	16173196	7394542	12407208	11453528	2925	13716209	43038502	12346696	7546342	46745776	5436666	2975934	7013934	17998332	9055923	8806716	9656180	6189981	10376372
MeOH_10,000 ngL- Rep 5_No Heat	20017730	37492534	36735849	37489706	40934770	43089710	50522594	41010870	37948642	26965664	11413220	565992	125689	11203825	6840330	6378042	6106647	6614004	3781524	1114075	3461630	32984603	15195148	5239978	3407941	642233	377650	2662712	494902	6987882	15364102	6900336	11037375	10476683	7460	12463144	41037992	10998779	6999575	43452785	5035866	2829050	6417650	16437961	8189342	8043389	8660527	5647433	9246515
0.03 NH4OH (MeOH)_100 ngL- Rep 1_Heat	105416	274223	362818	466157	648887	716724	940695	518791	415179	272442	93390	14032	3607	143308	97956	84506	107408	85726	55858	13575	18800	513788	190554	4587	4524	11899	4357	15311	293	97686	223198	92409	122521	160390	750	155440	684700	81805	131187	558126	37410	34358	66044	138838	60252	87631	114556	107662	45834
0.03 NH4OH (MeOH)_100 ngL- Rep 2_Heat	185033	349698	427459	530225	671807	671070	747417	219276	102362	47097	27223	6460	2621	161331	100851	85614	103278	73320	36953	5064	69289	405385	51209	7754	8341	6176	3541	5823	104	38931	224200	23803	127203	156131	305	118589	805809	107005	123583	573584	40948	34914	72510	195290	87170	119727	136393	103168	66149
0.03 NH4OH (MeOH)_100 ngL- Rep 3_Heat	179078	300344	390333	500884	649541	673241	791724	280591	142278	69639	27531	6955	3342	158618	99801	86286	103318	75257	41741	7353	49955	450063	83487	3925	3096	5939	2260	3629	423	67608	188232	33789	126382	163427	460	123269	717181	91648	132053	560631	36872	32406	70719	153005	68697	97609	122695	97285	50117
0.03 NH4OH (MeOH)_100 ngL- Rep 4_Heat	150813	308585	401028	506190	664673	713788	846739	302869	161148	77656	29255	6592	2596	161465	101143	84102	104863	80208	43657	8614	51931	463504	93674	4293	2966	6291	2897	4284	27	70709	197106	36929	124539	164241	339	131539	731652	91558	129346	567363	39173	33092	67846	161172	70309	99550	123808	105882	51543
0.03 NH4OH (MeOH)_100 ngL- Rep 5_Heat	167037	329466	411629	502448	634933	629512	758924	258481	132550	64785	25001	5861	3080	159217	96033	82648	96083	72683	38619	6709	62167	401338	69327	4253	3017	5698	2330	2958	133	46442	205806	28321	119660	157126	231	115576	757072	103768	116719	539243	35032	31096	66436	184780	81263	110201	135505	103172	64572
0.03 NH4OH (MeOH)_1,000 ngL- Rep 1_Heat	2415360	4266151	5195488	6360019	7954548	7976249	8850534	3357727	1737018	675990	255902	20783	3594	1586492	923549	921674	956350	850560	410291	78533	442051	4256960	857540	350330	127936	42778	15723	64413	543	163247	1787644	423266	1400107	1598941	812	1458702	8114457	1384015	984890	5387499	577914	302663	940825	2023018	1003039	999535	1052709	715594	1067037
0.03 NH4OH (MeOH)_1,000 ngL- Rep 2_Heat	2366935	4241937	5045310	6173889	7742313	7449940	8047621	2640449	1165191	400306	129026	10859	3270	1545523	899175	893686	895884	776869	368416	58421	442298	3804810	582702	239482	131066	26991	11764	64231	194	138805	1595382	298585	1364627	1550100	439	1345031	7910996	1328250	943446	5196052	541426	294152	904356	1993022	979128	960888	1046183	663775	1049926
0.03 NH4OH (MeOH)_1,000 ngL- Rep 3_Heat	2195390	3912978	4709212	5772316	7262654	7152663	8154816	3062547	1476352	525381	192872	21092	3767	1459863	849591	861854	846145	759205	376222	68200	415603	3778414	735423	305847	121126	35835	18936	71822	242	153994	1657460	369594	1278512	1460344	845	1336825	7493092	1277127	875894	4968160	498769	269890	858914	1897453	929153	910571	996215	653709	987120
0.03 NH4OH (MeOH)_1,000 ngL- Rep 4_Heat	2396524	4230680	5107936	6274496	7880511	8003670	9398195	3536315	1671055	546989	171410	14970	5222	1572240	911146	936178	956312	856785	421726	80143	440398	4285677	866871	190120	86982	38683	21918	46363	98	129196	1700271	444136	1377682	1555306	513	1473114	8033128	1320422	965281	5364604	550837	294436	930106	2003777	996215	979633	1056222	715677	1069200
0.03 NH4OH (MeOH)_1,000 ngL- Rep 5_Heat	2081437	3695368	4455712	5430832	6950937	7146415	8599777	3774113	2300217	871198	251302	14191	3149	1384153	802590	807359	842631	764624	388756	85672	388371	3809048	1016982	278975	109550	56258	28328	85147	1255	173538	1671525	502066	1213301	1371024	720	1327003	7101448	1209544	834739	4641424	487747	270910	812416	1796188	869431	870703	947231	626837	924989
0.03 NH4OH (MeOH)_10,000 ngL- Rep 1_Heat	24952473	46442423	39700548	41203132	45767712	47536686	56727176	45632986	41641077	29893842	9623032	253158	7415	13582373	9075780	7826851	7936057	8076135	4951821	1416580	4681821	39239903	19236248	2259020	2013248	770584	395058	1895446	12532	1783184	18332759	8767325	13649115	12913057	4218	15508137	46333613	13495612	9813147	52232385	6140605	3659989	7831199	20365518	10144733	9660545	10733739	6927641	11596253
0.03 NH4OH (MeOH)_10,000 ngL- Rep 2_Heat	26322771	47370456	39701526	41792152	45988121	48689122	57773537	45119268	37522020	18714014	4358420	81649	4823	14195625	9424057	8184306	8687093	8492111	5102959	1383275	4909844	40737521	18058524	803367	719833	571562	307136	648080	1972	4549807	16999154	7969428	14684982	13509241	2410	16313277	47178347	14137461	10774935	54302153	6551163	3837046	8030402	20819404	10578827	10132606	11142599	7215388	12168779
0.03 NH4OH (MeOH)_10,000 ngL- Rep 3_Heat	26784591	44727382	38898682	42096097	47053320	49402480	58206260	42930590	30738480	11467521	2540948	75431	4982	14098500	9546897	8303183	8865162	8342937	5007478	1240325	4991009	40921655	14782046	1389932	1644711	395917	165421	1134866	2807	2413243	13627005	6459123	14809367	13491993	2370	16369410	47114669	14347051	10891234	54494026	6797462	3696526	7802496	20898696	10599330	10269278	11200709	7152613	12295709
0.03 NH4OH (MeOH)_10,000 ngL- Rep 4_Heat	27006909	44544733	38794187	42642788	46482974	48806629	58329316	42634629	29399379	10476601	2216964	63832	6116	13925187	9555732	8309062	9115944	8488758	4985713	1211752	4986650	41054349	14599569	1371325	1591480	364271	150068	1118214	1873	1656133	11857236	6269647	14887826	13526412	1981	16337448	47620660	14048351	10791502	54425060	6561331	3472123	7750011	20914858	10658538	10285672	11339244	7146032	12347580
0.03 NH4OH (MeOH)_10,000 ngL- Rep 5_Heat	22942057	40837707	36261320	39902960	44012219	45773951	54907551	39530776	27022817	9785866	2245269	64858	4294	12304286	8345410	7195390	7438484	7053336	4031689	1021298	4256696	36351186	11744408	2535349	2202900	357132	174569	1394800	2626	1893604	15151969	5398690	12657228	11809450	1738	13449483	44817195	12485859	8916119	49589786	5807338	3253977	6948180	18222731	9089345	8806205	9518911	6251592	10487216
0.03 NH4OH (MeOH)_100 ngL- Rep 1_No Heat	205228	375590	444654	533936	668404	670725	797044	273136	151944	74861	30359	5043	2377	164177	98198	81491	101736	73811	36953	5441	41336	407830	62113	26501	12211	6663	4008	10982	219	58106	211361	33799	122014	144480	353	126726	825147	118929	117705	553995	41731	32516	69120	228737	71399	116270	139549	104253	73643
0.03 NH4OH (MeOH)_100 ngL- Rep 2_No Heat	201924	378834	444283	531519	655790	630941	704523	206014	86616	35354	12314	4836	2013	164180	99654	84321	100141	64830	33500	4251	50045	370443	43101	27983	12162	5779	2373	8567	232	57247	222210	19795	122022	146629	252	108354	825156	117983	117992	542217	38657	32519	69303	232991	76922	115469	138341	95612	75715
0.03 NH4OH (MeOH)_100 ngL- Rep 3_No Heat	217930	352189	421772	498641	623913	612339	733881	259898	125106	48633	15912	4503	2009	146166	92381	76285	97504	65572	38045	6338	39079	386550	68112	24730	9704	6318	2144	8080	261	46742	205122	25809	115955	155493	266	112923	759359	116731	109768	511577	36609	30850	63533	215140	68236	107060	127272	96515	70630
0.03 NH4OH (MeOH)_100 ngL- Rep 4_No Heat	235831	384192	445414	539872	665420	636067	692837	213650	106934	53207	20740	6037	2238	155768	100203	81653	100847	69098	33600	5389	42321	381761	51880	24783	11828	4276	1602	7714	127	60081	209324	21161	124882	144745	485	115297	831754	123967	121431	553900	35808	31536	70494	235150	73007	116048	139121	99153	75122
0.03 NH4OH (MeOH)_100 ngL- Rep 5_No Heat	192113	363018	424793	515540	633005	637057	732012	226741	96444	39056	12643	5409	2635	158999	95503	78015	98838	67692	38204	5857	20309	400569	60234	20234	6533	3911	2417	5454	208	40910	178520	23497	119595	141035	305	117120	785107	116302	119659	530600	40725	30176	65859	226421	69116	110252	133640	97852	71292
0.03 NH4OH (MeOH)_1,000 ngL- Rep 1_No Heat	2095251	3760806	4519503	5443155	6836480	6939173	8784120	4024341	2567932	1024556	332398	24280	4721	1386939	802480	815643	825727	747884	395006	91846	342251	3798475	1076859	277563	276023	61245	33069	242544	884	376238	1803676	533363	1221970	1361553	1846	1310774	7135039	1232555	823535	4671403	497467	267049	819646	1828853	849189	862289	950942	625873	940504
0.03 NH4OH (MeOH)_1,000 ngL- Rep 2_No Heat	2350065	4202727	5083901	6189832	7717406	7592431	8788788	3494526	1737669	568428	149496	8550	2432	1544772	892012	896713	894239	795904	396734	76086	384873	3991164	811769	394564	334071	44653	23844	221608	429	429352	1863744	417079	1350769	1511816	442	1418427	7906006	1375029	926699	5208890	560240	291984	910689	2043739	955015	953722	1032619	678813	1064484
0.03 NH4OH (MeOH)_1,000 ngL- Rep 3_No Heat	2053113	3690528	4487953	5406482	6823593	6856150	8549797	4014600	2615667	1004325	256901	10215	2023	1373251	794693	805782	820597	737490	387872	88310	336921	3694250	1044384	334118	307014	63691	31654	254047	743	361166	1768337	509353	1209515	1439008	382	1267269	6977165	1232837	787265	4602929	485108	267676	805005	1820330	841011	852625	917934	629924	914583
0.03 NH4OH (MeOH)_1,000 ngL- Rep 4_No Heat	2300949	4100517	4963727	5972679	7516401	7542265	9104437	3889924	2096305	707092	218994	15894	2610	1504041	870276	889511	925365	812029	403496	88734	370149	4131131	985049	338235	320980	50215	17215	231914	555	416882	1798306	479975	1332520	1482045	628	1410662	7757326	1308586	900366	5167013	525872	295492	874884	1992999	917344	927495	976566	676273	1019025
0.03 NH4OH (MeOH)_1,000 ngL- Rep 5_No Heat	1973155	3616905	4312865	5147762	6194485	5845071	6628235	2554995	1340665	459250	135231	11352	2642	1335879	765140	760354	736254	617639	284304	52957	332422	2889052	614422	257456	260400	46149	27450	218053	416	318658	1633372	275971	1175619	1255766	295	1035636	6651397	1184866	715475	4316707	252450	164368	793369	1773546	820458	817997	864033	539381	905319
0.03 NH4OH (MeOH)_10,000 ngL- Rep 1_No Heat	20577783	38648168	40870427	39121178	42440918	43869126	52194352	42515606	41615347	38140504	26576310	3659538	925156	11882271	7795198	6645323	6871415	6856376	4367887	1312412	3835909	35396831	18822977	5024527	3480126	736487	462102	2656781	456878	8388983	17227329	8392071	11419757	10978354	31202	12976262	44029282	11923585	7899273	47276194	5133054	3088968	6801032	17412146	8484546	8277471	8995060	5889763	9354517
0.03 NH4OH (MeOH)_10,000 ngL- Rep 2_No Heat	26221509	46486430	38699326	41250960	45497173	47959770	56913176	45035291	37418596	19913408	5279542	327488	268358	13743791	9094524	7868584	7919871	7987728	4928469	1346441	4791297	39212326	17125781	5223734	3806224	553746	291589	2510115	67252	6356500	18144192	7632848	14333077	13079558	5650	15113031	46637761	13719275	10983675	52619689	6245674	3717884	7902096	20714365	10409339	9882191	10948306	6899789	12028347
0.03 NH4OH (MeOH)_10,000 ngL- Rep 3_No Heat	27408036	46551820	38728875	42062607	46352353	48927867	57995106	42700023	30459215	11611150	3440668	393860	264251	14480241	9565378	8350756	8702094	8322650	5025180	1197130	5021694	40440969	14816517	5420723	3895687	423042	174889	2155737	35657	5593884	15691625	6109566	14969949	13391835	6560	15894108	47664926	14913543	11364109	54183064	6857956	3731829	7954465	21564876	10722398	10232058	11279508	7101264	12623829
0.03 NH4OH (MeOH)_10,000 ngL- Rep 4_No Heat	23482172	44039513	39899282	40572163	44461085	46590687	54982416	45020310	41795514	31433225	11408917	462134	228046	13053754	8580877	7368521	7453657	7644589	4857109	1391033	4344258	37393085	18976140	4951610	3570708	729098	426188	2719169	215594	8066851	18578268	8436328	13092202	12182786	5083	14583257	45120884	12792418	9727485	50741588	5903043	3614414	7468150	18998888	9587478	9200454	10059935	6564058	10932988
0.03 NH4OH (MeOH)_10,000 ngL- Rep 5_No Heat	22886535	42194969	37288329	39744284	43681748	46080309	54664002	42735830	35435249	18497407	4653161	202730	21078	12538821	8378480	7253583	7336981	7245001	4435948	1198382	4232846	36613198	15244481	4666763	3399773	538110	287616	2302997	69272	4964045	17587969	6805315	12822612	11863108	4091	13785708	44991071	12865415	8609705	50171410	5774524	3347787	7205296	18590517	9268200	8935639	9832521	6236457	10682948
[truncated: 1 more columns]
